# Supplementary material for: Maternal obesity and metabolic disorders associate with congenital heart defects in the offspring: a systematic review
Source: bioRxiv or medRxiv preprint supplement (doi:10.1101/2020.06.25.20140186), 2021-01-03
Supplement: Supplementary file [file 2020.06.25.20140186-1.pdf]

SEARCH PROTOCOL – October 2019

**Maternal BMI/overweight/obesity and CHDs in offspring**

PubMed Search Strategy

|                  | Aspect 1                                                                                                                                                                                                                                                | Aspect 2                                                                                  | Aspect 3                     |
|------------------|---------------------------------------------------------------------------------------------------------------------------------------------------------------------------------------------------------------------------------------------------------|-------------------------------------------------------------------------------------------|------------------------------|
| MeSH             | Heart defects, congenital                                                                                                                                                                                                                               | Body Mass Index OR Overweight OR Adiposity OR Thinness OR Metabolic Syndrome              | Pregnancy OR Infant OR Fetus |
| Free text search | Congenital heart defect* OR Congenital heart malformation* OR CHD OR Congenital heart disease* OR "Cardiac abnormalities" OR "Cardiac abnormality" OR Cardiac defect* OR Fetal heart OR Fetal cardiac defect* OR Foetal heart OR Foetal cardiac defect* | BMI OR Maternal overweight OR Maternal obesity OR Prepregnancy BMI OR Prepregnancy weight | Offspring* OR Pregnancy      |

PubMed Search 2019-10-06

|    |                                                                                                                                                                                                                                                                                                                                                                                                                                                     | No. of articles |
|----|-----------------------------------------------------------------------------------------------------------------------------------------------------------------------------------------------------------------------------------------------------------------------------------------------------------------------------------------------------------------------------------------------------------------------------------------------------|-----------------|
| #1 | "Heart Defects, Congenital"[Majr]                                                                                                                                                                                                                                                                                                                                                                                                                   | 121,469         |
| #2 | (((((((((Congenital heart defect*[Text Word]) OR Congenital heart malformation*[Text Word]) OR CHD[Text Word]) OR Congenital heart disease*[Text Word]) OR Cardiac abnormalities[Text Word]) OR Cardiac abnormality[Text Word]) OR Cardiac defect*[Text Word]) OR Fetal heart[Text Word]) OR Fetal cardiac defect*[Text Word]) OR Foetal heart[Text Word]) OR Foetal cardiac defect*[Text Word])                                                    | 105,996         |
| #3 | #1 OR #2<br>("Heart Defects, Congenital"[Majr] OR ((((((((((Congenital heart defect*[Text Word]) OR Congenital heart malformation*[Text Word]) OR CHD[Text Word]) OR Congenital heart disease*[Text Word]) OR Cardiac abnormalities[Text Word]) OR Cardiac abnormality[Text Word]) OR Cardiac defect*[Text Word]) OR Fetal heart[Text Word]) OR Fetal cardiac defect*[Text Word]) OR Foetal heart[Text Word]) OR Foetal cardiac defect*[Text Word]) | 181,349         |
| #4 | ((("Body Mass Index"[Majr] OR "Overweight"[Majr] OR "Adiposity"[Majr] OR "Thinness"[Majr] OR "Metabolic Syndrome"[Majr]                                                                                                                                                                                                                                                                                                                             | 185,465         |
| #5 | ((((Maternal overweight[Text Word]) OR Maternal obesity[Text Word]) OR Prepregnancy BMI[Text Word]) OR Prepregnancy weight[Text Word])                                                                                                                                                                                                                                                                                                              | 3,677           |
| #6 | #4 OR #5                                                                                                                                                                                                                                                                                                                                                                                                                                            | 187,082         |

|     |                                                                                                                                                                                                                                                                                                                                                                                                                                                                                                                                                                                                                                                                                                                                                                                                                                                                             |           |
|-----|-----------------------------------------------------------------------------------------------------------------------------------------------------------------------------------------------------------------------------------------------------------------------------------------------------------------------------------------------------------------------------------------------------------------------------------------------------------------------------------------------------------------------------------------------------------------------------------------------------------------------------------------------------------------------------------------------------------------------------------------------------------------------------------------------------------------------------------------------------------------------------|-----------|
|     | (((((("Body Mass Index"[Majr]) OR "Overweight"[Majr]) OR "Adiposity"[Majr]) OR "Thinness"[Majr]) OR "Metabolic Syndrome"[Majr])) OR (((Maternal overweight[Text Word]) OR Maternal obesity[Text Word]) OR Prepregnancy BMI[Text Word]) OR Prepregnancy weight[Text Word])                                                                                                                                                                                                                                                                                                                                                                                                                                                                                                                                                                                                   |           |
| #7  | (("Pregnancy"[Majr]) OR "Infant"[Majr]) OR "Fetus"[Majr]                                                                                                                                                                                                                                                                                                                                                                                                                                                                                                                                                                                                                                                                                                                                                                                                                    | 273,767   |
| #8  | (Offspring*[Text Word]) OR Pregnancy[Text Word]                                                                                                                                                                                                                                                                                                                                                                                                                                                                                                                                                                                                                                                                                                                                                                                                                             | 975,184   |
| #9  | #7 OR #8<br>(((("Pregnancy"[Majr]) OR "Infant"[Majr]) OR "Fetus"[Majr])) OR ((Offspring*[Text Word]) OR Pregnancy[Text Word])                                                                                                                                                                                                                                                                                                                                                                                                                                                                                                                                                                                                                                                                                                                                               | 1,053,307 |
| #10 | #3 AND #6 AND #9<br>(((("Heart Defects, Congenital"[Majr]) OR (((((((((((Congenital heart defect*[Text Word]) OR Congenital heart malformation*[Text Word]) OR CHD[Text Word]) OR Congenital heart disease*[Text Word]) OR Cardiac abnormalities[Text Word]) OR Cardiac abnormality[Text Word]) OR Cardiac defect*[Text Word]) OR Fetal heart[Text Word]) OR Fetal cardiac defect*[Text Word]) OR Foetal heart[Text Word]) OR Foetal cardiac defect*[Text Word]))) AND (((((((("Body Mass Index"[Majr]) OR "Overweight"[Majr]) OR "Adiposity"[Majr]) OR "Thinness"[Majr]) OR "Metabolic Syndrome"[Majr])) OR (((Maternal overweight[Text Word]) OR Maternal obesity[Text Word]) OR Prepregnancy BMI[Text Word]) OR Prepregnancy weight[Text Word]))) AND (((("Pregnancy"[Majr]) OR "Infant"[Majr]) OR "Fetus"[Majr])) OR ((Offspring*[Text Word]) OR Pregnancy[Text Word])) | 114       |

#### Embase Search Strategy

|                                                                                                             | Aspect 1                                                                                                                                                                                                                                                           | Aspect 2                                                                                                                                            | Aspect 3                                                                    |
|-------------------------------------------------------------------------------------------------------------|--------------------------------------------------------------------------------------------------------------------------------------------------------------------------------------------------------------------------------------------------------------------|-----------------------------------------------------------------------------------------------------------------------------------------------------|-----------------------------------------------------------------------------|
| "MeSH" / Subject Heading<br><br>(Keyword + Map Term to Subject Heading + Explode + Include All Subheadings) | congenital heart malformation                                                                                                                                                                                                                                      | exp body mass/ or exp obesity/ or exp underweight/<br><br>("Obesity" broader term for "metabolic syndrome X", "maternal obesity", "morbid obesity") | exp high risk pregnancy/ or exp pregnancy/ or infant/ or newborn/ or fetus/ |
| Free text search<br><br>(Keyword)                                                                           | Congenital heart defect* OR<br>Congenital heart malformation* OR<br>CHD OR Congenital heart disease* OR<br>Cardiac abnormalities OR Cardiac abnormality OR Cardiac defect* OR<br>Fetal heart OR Fetal cardiac defect* OR<br>Foetal heart OR Foetal cardiac defect* | Maternal overweight OR Maternal obesity OR Prepregnancy BMI OR<br>Pregpregnancy weight                                                              | Offspring* OR Pregnancy                                                     |

|        |                                                                                                                                                                                                                                                     | No. of articles |
|--------|-----------------------------------------------------------------------------------------------------------------------------------------------------------------------------------------------------------------------------------------------------|-----------------|
| #1     | exp congenital heart malformation/                                                                                                                                                                                                                  | 126,712         |
| #2     | Congenital heart defect* OR Congenital heart malformation* OR CHD OR Congenital heart disease* OR Cardiac abnormalities OR Cardiac abnormality OR Cardiac defect* OR Fetal heart OR Fetal cardiac defect* OR Foetal heart OR Foetal cardiac defect* | 128,917         |
| #3     | #1 OR #2                                                                                                                                                                                                                                            | 206,398         |
| #4     | exp high risk pregnancy/ or exp pregnancy/ or infant/ or newborn/ or fetus/                                                                                                                                                                         | 1,571,089       |
| #5     | Offspring* OR Pregnancy                                                                                                                                                                                                                             | 882,813         |
| #6     | #4 OR #5                                                                                                                                                                                                                                            | 1,768,205       |
| #7     | exp body mass/ or exp obesity/ or exp underweight/                                                                                                                                                                                                  | 761,522         |
| #8     | Maternal overweight OR Maternal obesity OR Prepregnancy BMI OR Prepregnancy weight                                                                                                                                                                  | 7,737           |
| #9     | #7 OR #8                                                                                                                                                                                                                                            | 762,132         |
| #10    | #3 AND #6 AND #9                                                                                                                                                                                                                                    | 1,046           |
| LIMITS | English Language + Exclude MEDLINE journals                                                                                                                                                                                                         | 91              |

## Maternal hypertension or preeclampsia and CHDs in offspring

### PubMed Search Strategy

|                  | Aspect 1                  | Aspect 2                                                                             | Aspect 3                     |
|------------------|---------------------------|--------------------------------------------------------------------------------------|------------------------------|
| MeSH             | Heart defects, congenital | Hypertension OR Hypertension, pregnancy-induced                                      | Pregnancy OR Infant OR Fetus |
| Free text search | (as above)                | Maternal hypertension OR Maternal hypertensive disorder* OR Gestational hypertension | (as above)                   |

### PubMed Search 2019-10-06

|     |                                                                                                                                                                                                                                                                                                                                                                                                                                                                                                                                                                                                                                                                                                                                                                                                     | No. of articles |
|-----|-----------------------------------------------------------------------------------------------------------------------------------------------------------------------------------------------------------------------------------------------------------------------------------------------------------------------------------------------------------------------------------------------------------------------------------------------------------------------------------------------------------------------------------------------------------------------------------------------------------------------------------------------------------------------------------------------------------------------------------------------------------------------------------------------------|-----------------|
| #3  | #1 OR #2 (as above)                                                                                                                                                                                                                                                                                                                                                                                                                                                                                                                                                                                                                                                                                                                                                                                 | 181,349         |
| #4  | ("Hypertension"[Majr]) OR "Hypertension, Pregnancy-Induced"[Mesh]                                                                                                                                                                                                                                                                                                                                                                                                                                                                                                                                                                                                                                                                                                                                   | 211,800         |
| #5  | ((Maternal hypertension[Text Word]) OR Maternal hypertensive disorder*[Text Word]) OR Gestational hypertension[Text Word]                                                                                                                                                                                                                                                                                                                                                                                                                                                                                                                                                                                                                                                                           | 3,466           |
| #6  | #4 OR #5<br>(((("Hypertension"[Majr]) OR "Hypertension, Pregnancy-Induced"[Mesh])) OR (((Maternal hypertension[Text Word]) OR Maternal hypertensive disorder*[Text Word]) OR Gestational hypertension[Text Word]))                                                                                                                                                                                                                                                                                                                                                                                                                                                                                                                                                                                  | 213,166         |
| #9  | #7 OR #8 (as above)                                                                                                                                                                                                                                                                                                                                                                                                                                                                                                                                                                                                                                                                                                                                                                                 | 1,053,307       |
| #10 | #3 AND #6 AND #9<br>((((("Hypertension"[Majr]) OR "Hypertension, Pregnancy-Induced"[Mesh])) OR (((Maternal hypertension[Text Word]) OR Maternal hypertensive disorder*[Text Word]) OR Gestational hypertension[Text Word]))) AND (((("Pregnancy"[Majr]) OR "Infant"[Majr]) OR "Fetus"[Majr])) OR ((Offspring*[Text Word]) OR Pregnancy[Text Word])) AND (("Heart Defects, Congenital"[Majr]) OR (((((((((((Congenital heart defect*[Text Word]) OR Congenital heart malformation*[Text Word]) OR CHD[Text Word]) OR Congenital heart disease*[Text Word]) OR Cardiac abnormalities[Text Word]) OR Cardiac abnormality[Text Word]) OR Cardiac defect*[Text Word]) OR Fetal heart[Text Word]) OR Fetal cardiac defect*[Text Word]) OR Foetal heart[Text Word]) OR Foetal cardiac defect*[Text Word])) | 661             |

### Embase Search Strategy

|                          | Aspect 1                      | Aspect 2                                               | Aspect 3                                                                    |
|--------------------------|-------------------------------|--------------------------------------------------------|-----------------------------------------------------------------------------|
| "MeSH" / Subject Heading | congenital heart malformation | exp hypertension/ or exp "eclampsia and preeclampsia"/ | exp high risk pregnancy/ or exp pregnancy/ or infant/ or newborn/ or fetus/ |

|                  |            |                                                                                      |            |
|------------------|------------|--------------------------------------------------------------------------------------|------------|
| Free text search | (as above) | Maternal hypertension OR Maternal hypertensive disorder* OR Gestational hypertension | (as above) |
|------------------|------------|--------------------------------------------------------------------------------------|------------|

*Embase Search 2019-10-06*

|        |                                                                                      | No. of articles |
|--------|--------------------------------------------------------------------------------------|-----------------|
| #3     | #1 OR #2 (as above)                                                                  | 206,398         |
| #6     | #4 OR #5 (as above)                                                                  | 1,768,205       |
| #7     | exp hypertension/ or exp "eclampsia and preeclampsia"/                               | 735,885         |
| #8     | Maternal hypertension OR Maternal hypertensive disorder* OR Gestational hypertension | 18,442          |
| #9     | #7 OR #8                                                                             | 736,285         |
| #10    | #3 AND #6 AND #9                                                                     | 2,637           |
| LIMITS | English Language + Exclude MEDLINE journals                                          | 270             |

## Maternal diabetes and CHDs in offspring

### PubMed Search Strategy

|                  | Aspect 1                  | Aspect 2                                                                                                                      | Aspect 3                     |
|------------------|---------------------------|-------------------------------------------------------------------------------------------------------------------------------|------------------------------|
| MeSH             | Heart defects, congenital | Diabetes Mellitus OR Pregnancy in diabetics OR Hyperglycemia OR Insulin Resistance                                            | Pregnancy OR Infant OR Fetus |
| Free text search | (as above)                | Pregestational diabetes OR PGDM OR Maternal diabetes OR Gestational diabetes OR GDM OR Diabetic women OR Diabetic pregnancies | (as above)                   |

### PubMed Search 2019-10-06

|     |                                                                                                                                                                                                                                                                                                                                                                                                                                                                                                                                                                                                                                                                                                                                                                                                                                                                                                                                                       | No. of articles |
|-----|-------------------------------------------------------------------------------------------------------------------------------------------------------------------------------------------------------------------------------------------------------------------------------------------------------------------------------------------------------------------------------------------------------------------------------------------------------------------------------------------------------------------------------------------------------------------------------------------------------------------------------------------------------------------------------------------------------------------------------------------------------------------------------------------------------------------------------------------------------------------------------------------------------------------------------------------------------|-----------------|
| #3  | #1 OR #2 (as above)                                                                                                                                                                                                                                                                                                                                                                                                                                                                                                                                                                                                                                                                                                                                                                                                                                                                                                                                   | 181,349         |
| #4  | ((("Diabetes Mellitus"[Majr]) OR "Pregnancy in Diabetics"[Mesh]) OR "Hyperglycemia"[Majr] OR "Insulin Resistance"[Majr])                                                                                                                                                                                                                                                                                                                                                                                                                                                                                                                                                                                                                                                                                                                                                                                                                              | 386,821         |
| #5  | (((((Pregestational diabetes[Text Word]) OR PGDM[Text Word]) OR Maternal diabetes[Text Word]) OR Gestational diabetes[Text Word]) OR GDM[Text Word]) OR Diabetic women[Text Word]) OR Diabetic pregnancies[Text Word]                                                                                                                                                                                                                                                                                                                                                                                                                                                                                                                                                                                                                                                                                                                                 | 20,405          |
| #6  | #4 OR #5<br>((((("Diabetes Mellitus"[Majr]) OR "Pregnancy in Diabetics"[Mesh]) OR "Hyperglycemia"[Majr] OR "Insulin Resistance"[Majr])) OR ((((((Pregestational diabetes[Text Word]) OR PGDM[Text Word]) OR Maternal diabetes[Text Word]) OR Gestational diabetes[Text Word]) OR GDM[Text Word]) OR Diabetic women[Text Word]) OR Diabetic pregnancies[Text Word]))                                                                                                                                                                                                                                                                                                                                                                                                                                                                                                                                                                                   | 393,455         |
| #9  | #7 OR #8 (as above)                                                                                                                                                                                                                                                                                                                                                                                                                                                                                                                                                                                                                                                                                                                                                                                                                                                                                                                                   | 1,053,307       |
| #10 | #3 AND #6 AND #9<br>(((((((("Diabetes Mellitus"[Majr]) OR "Pregnancy in Diabetics"[Mesh]) OR "Hyperglycemia"[Majr] OR "Insulin Resistance"[Majr])) OR ((((((Pregestational diabetes[Text Word]) OR PGDM[Text Word]) OR Maternal diabetes[Text Word]) OR Gestational diabetes[Text Word]) OR GDM[Text Word]) OR Diabetic women[Text Word]) OR Diabetic pregnancies[Text Word]))) AND (((("Pregnancy"[Majr]) OR "Infant"[Majr] OR "Fetus"[Majr]) OR ((Offspring*[Text Word]) OR Pregnancy[Text Word]))) AND (((("Heart Defects, Congenital"[Majr]) OR (((((((Congenital heart defect*[Text Word]) OR Congenital heart malformation*[Text Word]) OR CHD[Text Word]) OR Congenital heart disease*[Text Word]) OR Cardiac abnormalities[Text Word]) OR Cardiac abnormality[Text Word]) OR Cardiac defect*[Text Word]) OR Fetal heart[Text Word]) OR Fetal cardiac defect*[Text Word]) OR Foetal heart[Text Word]) OR Foetal cardiac defect*[Text Word])))) | 632             |

### Embase Search Strategy

|                          | Aspect 1                      | Aspect 2                                                                                                                      | Aspect 3                                                                    |
|--------------------------|-------------------------------|-------------------------------------------------------------------------------------------------------------------------------|-----------------------------------------------------------------------------|
| "MeSH" / Subject Heading | congenital heart malformation | exp diabetes mellitus/ or exp hyperglycemia/ or exp insulin resistance/                                                       | exp high risk pregnancy/ or exp pregnancy/ or infant/ or newborn/ or fetus/ |
| Free text search         | (as above)                    | Pregestational diabetes OR PGDM OR Maternal diabetes OR Gestational diabetes OR GDM OR Diabetic women OR Diabetic pregnancies | (as above)                                                                  |

*Embase Search 2019-10-06*

|        |                                                                                                                               | No. of articles |
|--------|-------------------------------------------------------------------------------------------------------------------------------|-----------------|
| #3     | #1 OR #2 (as above)                                                                                                           | 206,398         |
| #6     | #4 OR #5 (as above)                                                                                                           | 1,768,205       |
| #7     | exp diabetes mellitus/ or exp hyperglycemia/ or exp insulin resistance/                                                       | 1,005,513       |
| #8     | Pregestational diabetes OR PGDM OR Maternal diabetes OR Gestational diabetes OR GDM OR Diabetic women OR Diabetic pregnancies | 32,162          |
| #9     | #7 OR #8                                                                                                                      | 1,008,162       |
| #10    | #3 AND #6 AND #9                                                                                                              | 2,001           |
| LIMITS | English Language + Exclude MEDLINE journals                                                                                   | 182             |

## Maternal dyslipidemia and CHDs in offspring

### PubMed Search Strategy

|                  | Aspect 1                  | Aspect 2                           | Aspect 3                     |
|------------------|---------------------------|------------------------------------|------------------------------|
| MeSH             | Heart defects, congenital | Dyslipidemias OR Lipoproteins, HDL | Pregnancy OR Infant OR Fetus |
| Free text search | (as above)                | HDL OR Dyslipidemia*               | (as above)                   |

### PubMed Search 2019-10-06

|     |                                                                                                                                                                                                                                                                                                                                                                                                                                                                                                                                                                                                                                                                                                                                             | No. of articles |
|-----|---------------------------------------------------------------------------------------------------------------------------------------------------------------------------------------------------------------------------------------------------------------------------------------------------------------------------------------------------------------------------------------------------------------------------------------------------------------------------------------------------------------------------------------------------------------------------------------------------------------------------------------------------------------------------------------------------------------------------------------------|-----------------|
| #3  | #1 OR #2 (as above)                                                                                                                                                                                                                                                                                                                                                                                                                                                                                                                                                                                                                                                                                                                         | 181,349         |
| #4  | ("Dyslipidemias"[Majr] OR "Lipoproteins, HDL"[Majr]                                                                                                                                                                                                                                                                                                                                                                                                                                                                                                                                                                                                                                                                                         | 66,228          |
| #5  | (Dyslipidemia*[Text Word]) OR HDL[Text Word]                                                                                                                                                                                                                                                                                                                                                                                                                                                                                                                                                                                                                                                                                                | 103,854         |
| #6  | #4 OR #5<br>(((("Dyslipidemias"[Majr] OR "Lipoproteins, HDL"[Majr])) OR ((Dyslipidemia*[Text Word]) OR HDL[Text Word])))                                                                                                                                                                                                                                                                                                                                                                                                                                                                                                                                                                                                                    | 138,647         |
| #9  | #7 OR #8 (as above)                                                                                                                                                                                                                                                                                                                                                                                                                                                                                                                                                                                                                                                                                                                         | 1,053,307       |
| #10 | #3 AND #6 AND #9<br>(#52 AND #96 AND #62)<br>((((("Dyslipidemias"[Majr] OR "Lipoproteins, HDL"[Majr])) OR ((Dyslipidemia*[Text Word]) OR HDL[Text Word]))) AND<br>((((("Pregnancy"[Majr] OR "Infant"[Majr] OR "Fetus"[Majr])) OR ((Offspring*[Text Word]) OR Pregnancy[Text Word]))) AND (("Heart<br>Defects, Congenital"[Majr] OR (((((((Congenital heart defect*[Text Word]) OR Congenital heart malformation*[Text Word]) OR<br>CHD[Text Word]) OR Congenital heart disease*[Text Word]) OR Cardiac abnormalities[Text Word]) OR Cardiac abnormality[Text Word])<br>OR Cardiac defect*[Text Word]) OR Fetal heart[Text Word]) OR Fetal cardiac defect*[Text Word]) OR Foetal heart[Text Word]) OR<br>Foetal cardiac defect*[Text Word])) | 87              |

### Embase Search Strategy

|                          | Aspect 1                      | Aspect 2                                                                              | Aspect 3                                                                          |
|--------------------------|-------------------------------|---------------------------------------------------------------------------------------|-----------------------------------------------------------------------------------|
| "MeSH" / Subject Heading | congenital heart malformation | exp dyslipidemia/ or exp<br>hypertriglyceridemia/ or exp high<br>density lipoprotein/ | exp high risk pregnancy/ or exp<br>pregnancy/ or infant/ or newborn/ or<br>fetus/ |
| Free text search         | (as above)                    | HDL OR Dyslipidemia*                                                                  | (as above)                                                                        |

### Embase Search 2019-10-06

|  |  | No. of articles |
|--|--|-----------------|
|  |  |                 |



|        |                                                                                 |           |
|--------|---------------------------------------------------------------------------------|-----------|
| #3     | #1 OR #2 (as above)                                                             | 206,398   |
| #6     | #4 OR #5 (as above)                                                             | 1,768,205 |
| #7     | exp dyslipidemia/ or exp hypertriglyceridemia/ or exp high density lipoprotein/ | 145,111   |
| #8     | HDL OR Dyslipidemia*                                                            | 166,506   |
| #9     | #7 OR #8                                                                        | 202,390   |
| #10    | #3 AND #6 AND #9                                                                | 187       |
| LIMITS | English Language + Exclude MEDLINE journals                                     | 17        |
