# Supplementary material for: Maternal obesity and metabolic disorders associate with congenital heart defects in the offspring: a systematic review
Source: bioRxiv or medRxiv preprint supplement (doi:10.1101/2020.06.25.20140186), 2021-01-03
Supplement: Supplementary file [file 2020.06.25.20140186-1.pdf]

## Supporting information

---

### Maternal obesity and metabolic disorders associate with congenital heart defects in the offspring: a systematic review

Gitte Hedermann\*<sup>1</sup>, Paula L Hedley<sup>1</sup>, Ida N Thagaard<sup>1,2</sup>, Lone Krebs<sup>3,4</sup>, Charlotte Kvist Ekelund<sup>4,5</sup>, Thorkild IA Sørensen<sup>6,7</sup>, Michael Christiansen<sup>1,8</sup>

<sup>1</sup> Department for Congenital Disorders, Danish National Biobank and Biomarkers, Statens Serum Institut, Copenhagen, Denmark

<sup>2</sup> Department of Obstetrics and Gynaecology, Copenhagen University Hospital, Rigshospitalet, Copenhagen, Denmark

<sup>3</sup> Department of Obstetrics and Gynaecology, Copenhagen University Hospital, Amager and Hvidovre Hospital, Copenhagen, Denmark

<sup>4</sup> Department of Clinical Medicine, University of Copenhagen, Copenhagen, Denmark

<sup>5</sup> Center of Fetal Medicine, Department of Obstetrics, Copenhagen University Hospital, Rigshospitalet, Copenhagen, Denmark

<sup>6</sup> Department of Public Health, Section of Epidemiology, University of Copenhagen, Copenhagen, Denmark

<sup>7</sup> The Novo Nordisk Foundation Center for Basic Metabolic Research, Faculty of Health and Medical Sciences, University of Copenhagen, Copenhagen, Denmark

<sup>8</sup> Department of Biomedical Sciences, University of Copenhagen, Copenhagen, Denmark

Corresponding author\*: Department for Congenital Disorders, Danish National Biobank and Biomarkers  
Statens Serum Institut, Artillerivej 5, 2300 Copenhagen, Denmark  
gihc@ssi.dk

| Table of Contents                                             |          | Page  |
|---------------------------------------------------------------|----------|-------|
| Search protocol                                               | Table S1 | 3-7   |
| Newcastle-Ottawa Quality Assessment Scale                     | Table S2 | 8-10  |
| Characteristics of included studies                           | Table S3 | 11-12 |
| Maternal metabolic disorders and risk of ... in the offspring |          |       |
| Heterotaxia                                                   | Fig. S1  | 13    |
| Univentricular heart                                          | Fig. S2  | 14    |
| Conotruncal defects                                           | Fig. S3  | 15    |
| Common truncus                                                | Fig. S4  | 16    |
| Transposition of the great arteries                           | Fig. S5  | 17    |
| Tetralogy of Fallot                                           | Fig. S6  | 18    |
| Double outlet right ventricle                                 | Fig. S7  | 19    |
| Aortic arch defects                                           | Fig. S8  | 20    |
| Atrioventricular septal defects                               | Fig. S9  | 21    |
| Anomalous pulmonary venous return                             | Fig. S10 | 22    |
| Left ventricular outflow tract defects                        | Fig. S11 | 23    |
| Hypoplastic left heart syndrome                               | Fig. S12 | 24    |
| Coarctation of the Aorta                                      | Fig. S13 | 25    |
| Aortic stenosis                                               | Fig. S14 | 26    |
| Right ventricular outflow tract defects                       | Fig. S15 | 27    |
| Pulmonary valve stenosis                                      | Fig. S16 | 28    |
| Ebstein's anomaly                                             | Fig. S17 | 29    |
| Septal defects                                                | Fig. S18 | 30    |
| Atrial septal defects                                         | Fig. S19 | 31    |
| Ventricular septal defects                                    | Fig. S20 | 32    |

## Abbreviations:

ABDCCS, Atlanta Birth Defect Case-Control Study; BDRFSS, Birth Defects Risk Factor Surveillance Study; BMI, body mass index; CHDs, congenital heart defects; CM, congenital malformations; CSL, The Consortium of Safe Labor; DM1, diabetes mellitus type 1; DM2, diabetes mellitus type 2; GDM, gestational diabetes mellitus; NBDPS, National Birth Defects Prevention Study; NOS, Newcastle Ottawa Scale; OR, odds ratio; PE, preeclampsia; PGDM, pre-gestational diabetes; PR, prevalence ratio; RR, risk ratio.

Table S1: Search protocol

PubMed and Embase: Publications between January 1, 1990 and October 6, 2019.

### Maternal overweight or obesity or metabolic syndrome and CHDs in offspring

#### PubMed Search Strategy

|                  | Aspect 1                                                                                                                                                                                                                                                                        | Aspect 2                                                                                           | Aspect 3                     |
|------------------|---------------------------------------------------------------------------------------------------------------------------------------------------------------------------------------------------------------------------------------------------------------------------------|----------------------------------------------------------------------------------------------------|------------------------------|
| MeSH             | Heart defects, congenital                                                                                                                                                                                                                                                       | Body Mass Index OR Overweight<br>OR Adiposity OR Thinness OR<br>Metabolic Syndrome                 | Pregnancy OR Infant OR Fetus |
| Free text search | Congenital heart defect* OR<br>Congenital heart malformation*<br>OR CHD OR Congenital heart<br>disease* OR "Cardiac<br>abnormalities" OR "Cardiac<br>abnormality" OR Cardiac defect*<br>OR Fetal heart OR Fetal cardiac<br>defect* OR Foetal heart OR Foetal<br>cardiac defect* | BMI OR Maternal overweight OR<br>Maternal obesity OR<br>Prepregnancy BMI OR<br>Prepregnancy weight | Offspring* OR Pregnancy      |

#### PubMed Search 2019-10-06

|     |                                                                                                                                                                                                                                                                                                                                                                                                                                                                                                                                                                                                                                                                                                                                                                                                                                                                        | No. of articles |
|-----|------------------------------------------------------------------------------------------------------------------------------------------------------------------------------------------------------------------------------------------------------------------------------------------------------------------------------------------------------------------------------------------------------------------------------------------------------------------------------------------------------------------------------------------------------------------------------------------------------------------------------------------------------------------------------------------------------------------------------------------------------------------------------------------------------------------------------------------------------------------------|-----------------|
| #1  | "Heart Defects, Congenital"[Majr]                                                                                                                                                                                                                                                                                                                                                                                                                                                                                                                                                                                                                                                                                                                                                                                                                                      | 121,469         |
| #2  | (((((Congenital heart defect*[Text Word]) OR Congenital heart malformation*[Text Word]) OR CHD[Text Word]) OR Congenital heart disease*[Text Word]) OR Cardiac abnormalities[Text Word]) OR Cardiac abnormality[Text Word]) OR Cardiac defect*[Text Word]) OR Fetal heart[Text Word]) OR Fetal cardiac defect*[Text Word]) OR Foetal heart[Text Word]) OR Foetal cardiac defect*[Text Word]                                                                                                                                                                                                                                                                                                                                                                                                                                                                            | 105,996         |
| #3  | #1 OR #2<br>("Heart Defects, Congenital"[Majr]) OR (((((((Congenital heart defect*[Text Word]) OR Congenital heart malformation*[Text Word]) OR CHD[Text Word]) OR Congenital heart disease*[Text Word]) OR Cardiac abnormalities[Text Word]) OR Cardiac abnormality[Text Word]) OR Cardiac defect*[Text Word]) OR Fetal heart[Text Word]) OR Fetal cardiac defect*[Text Word]) OR Foetal heart[Text Word]) OR Foetal cardiac defect*[Text Word]                                                                                                                                                                                                                                                                                                                                                                                                                       | 181,349         |
| #4  | ((("Body Mass Index"[Majr]) OR "Overweight"[Majr]) OR "Adiposity"[Majr]) OR "Thinness"[Majr]) OR "Metabolic Syndrome"[Majr]                                                                                                                                                                                                                                                                                                                                                                                                                                                                                                                                                                                                                                                                                                                                            | 185,465         |
| #5  | ((Maternal overweight[Text Word]) OR Maternal obesity[Text Word]) OR Prepregnancy BMI[Text Word]) OR Prepregnancy weight[Text Word]                                                                                                                                                                                                                                                                                                                                                                                                                                                                                                                                                                                                                                                                                                                                    | 3,677           |
| #6  | #4 OR #5<br>((((("Body Mass Index"[Majr]) OR "Overweight"[Majr]) OR "Adiposity"[Majr]) OR "Thinness"[Majr]) OR "Metabolic Syndrome"[Majr]) OR (((Maternal overweight[Text Word]) OR Maternal obesity[Text Word]) OR Prepregnancy BMI[Text Word]) OR Prepregnancy weight[Text Word])                                                                                                                                                                                                                                                                                                                                                                                                                                                                                                                                                                                    | 187,082         |
| #7  | ("Pregnancy"[Majr]) OR "Infant"[Majr]) OR "Fetus"[Majr]                                                                                                                                                                                                                                                                                                                                                                                                                                                                                                                                                                                                                                                                                                                                                                                                                | 273,767         |
| #8  | (Offspring*[Text Word]) OR Pregnancy[Text Word]                                                                                                                                                                                                                                                                                                                                                                                                                                                                                                                                                                                                                                                                                                                                                                                                                        | 975,184         |
| #9  | #7 OR #8<br>(((("Pregnancy"[Majr]) OR "Infant"[Majr]) OR "Fetus"[Majr])) OR ((Offspring*[Text Word]) OR Pregnancy[Text Word])                                                                                                                                                                                                                                                                                                                                                                                                                                                                                                                                                                                                                                                                                                                                          | 1,053,307       |
| #10 | #3 AND #6 AND #9<br>((((("Heart Defects, Congenital"[Majr]) OR (((((((Congenital heart defect*[Text Word]) OR Congenital heart malformation*[Text Word]) OR CHD[Text Word]) OR Congenital heart disease*[Text Word]) OR Cardiac abnormalities[Text Word]) OR Cardiac abnormality[Text Word]) OR Cardiac defect*[Text Word]) OR Fetal heart[Text Word]) OR Fetal cardiac defect*[Text Word]) OR Foetal heart[Text Word]) OR Foetal cardiac defect*[Text Word])) AND (((((((("Body Mass Index"[Majr]) OR "Overweight"[Majr]) OR "Adiposity"[Majr]) OR "Thinness"[Majr]) OR "Metabolic Syndrome"[Majr])) OR (((Maternal overweight[Text Word]) OR Maternal obesity[Text Word]) OR Prepregnancy BMI[Text Word]) OR Prepregnancy weight[Text Word])) AND (((("Pregnancy"[Majr]) OR "Infant"[Majr]) OR "Fetus"[Majr])) OR ((Offspring*[Text Word]) OR Pregnancy[Text Word])) | 114             |

*Embase Search Strategy*

|                                                                                                             | Aspect 1                                                                                                                                                                                                                                            | Aspect 2                                                                                                                                               | Aspect 3                                                                    |
|-------------------------------------------------------------------------------------------------------------|-----------------------------------------------------------------------------------------------------------------------------------------------------------------------------------------------------------------------------------------------------|--------------------------------------------------------------------------------------------------------------------------------------------------------|-----------------------------------------------------------------------------|
| "MeSH" / Subject Heading<br><br>(Keyword + Map Term to Subject Heading + Explode + Include All Subheadings) | congenital heart malformation                                                                                                                                                                                                                       | exp body mass/ or exp obesity/<br>or exp underweight/<br><br>("Obesity" broader term for "metabolic syndrome X", "maternal obesity", "morbid obesity") | exp high risk pregnancy/ or exp pregnancy/ or infant/ or newborn/ or fetus/ |
| Free text search<br><br>(Keyword)                                                                           | Congenital heart defect* OR Congenital heart malformation* OR CHD OR Congenital heart disease* OR Cardiac abnormalities OR Cardiac abnormality OR Cardiac defect* OR Fetal heart OR Fetal cardiac defect* OR Foetal heart OR Foetal cardiac defect* | Maternal overweight OR Maternal obesity OR Prepregnancy BMI OR Prepregnancy weight                                                                     | Offspring* OR Pregnancy                                                     |

*Embase Search 2019-10-06*

|        |                                                                                                                                                                                                                                                     | No. of articles |
|--------|-----------------------------------------------------------------------------------------------------------------------------------------------------------------------------------------------------------------------------------------------------|-----------------|
| #1     | exp congenital heart malformation/                                                                                                                                                                                                                  | 126,712         |
| #2     | Congenital heart defect* OR Congenital heart malformation* OR CHD OR Congenital heart disease* OR Cardiac abnormalities OR Cardiac abnormality OR Cardiac defect* OR Fetal heart OR Fetal cardiac defect* OR Foetal heart OR Foetal cardiac defect* | 128,917         |
| #3     | #1 OR #2                                                                                                                                                                                                                                            | 206,398         |
| #4     | exp high risk pregnancy/ or exp pregnancy/ or infant/ or newborn/ or fetus/                                                                                                                                                                         | 1,571,089       |
| #5     | Offspring* OR Pregnancy                                                                                                                                                                                                                             | 882,813         |
| #6     | #4 OR #5                                                                                                                                                                                                                                            | 1,768,205       |
| #7     | exp body mass/ or exp obesity/ or exp underweight/                                                                                                                                                                                                  | 761,522         |
| #8     | Maternal overweight OR Maternal obesity OR Prepregnancy BMI OR Prepregnancy weight                                                                                                                                                                  | 7,737           |
| #9     | #7 OR #8                                                                                                                                                                                                                                            | 762,132         |
| #10    | #3 AND #6 AND #9                                                                                                                                                                                                                                    | 1,046           |
| LIMITS | English Language + Exclude MEDLINE journals                                                                                                                                                                                                         | 91              |

**Maternal diabetes and CHDs in offspring***PubMed Search Strategy*

|                  | Aspect 1                  | Aspect 2                                                                                                                      | Aspect 3                     |
|------------------|---------------------------|-------------------------------------------------------------------------------------------------------------------------------|------------------------------|
| MeSH             | Heart defects, congenital | Diabetes Mellitus OR Pregnancy in diabetics OR Hyperglycemia OR Insulin Resistance                                            | Pregnancy OR Infant OR Fetus |
| Free text search | (as above)                | Pregestational diabetes OR PGDM OR Maternal diabetes OR Gestational diabetes OR GDM OR Diabetic women OR Diabetic pregnancies | (as above)                   |

*PubMed Search 2019-10-06*

|    |                                                                                                                          | No. of articles |
|----|--------------------------------------------------------------------------------------------------------------------------|-----------------|
| #3 | #1 OR #2 (as above)                                                                                                      | 181,349         |
| #4 | ((("Diabetes Mellitus"[Majr]) OR "Pregnancy in Diabetics"[Mesh]) OR "Hyperglycemia"[Majr]) OR "Insulin Resistance"[Majr] | 386,821         |
| #5 | 20,405                                                                                                                   |                 |

|     |                                                                                                                                                                                                                                                                                                                                                                                                                                                                                                                                                                                                                                                                                                                                                                                                                                                                                                                                                    |           |
|-----|----------------------------------------------------------------------------------------------------------------------------------------------------------------------------------------------------------------------------------------------------------------------------------------------------------------------------------------------------------------------------------------------------------------------------------------------------------------------------------------------------------------------------------------------------------------------------------------------------------------------------------------------------------------------------------------------------------------------------------------------------------------------------------------------------------------------------------------------------------------------------------------------------------------------------------------------------|-----------|
| #6  | #4 OR #5<br>((((("Diabetes Mellitus"[Majr]) OR "Pregnancy in Diabetics"[Mesh]) OR "Hyperglycemia"[Majr]) OR "Insulin Resistance"[Majr])) OR ((((((Pregestational diabetes[Text Word]) OR PGDM[Text Word]) OR Maternal diabetes[Text Word]) OR Gestational diabetes[Text Word]) OR GDM[Text Word]) OR Diabetic women[Text Word]) OR Diabetic pregnancies[Text Word])                                                                                                                                                                                                                                                                                                                                                                                                                                                                                                                                                                                | 393,455   |
| #9  | #7 OR #8 (as above)                                                                                                                                                                                                                                                                                                                                                                                                                                                                                                                                                                                                                                                                                                                                                                                                                                                                                                                                | 1,053,307 |
| #10 | #3 AND #6 AND #9<br>(((((((("Diabetes Mellitus"[Majr]) OR "Pregnancy in Diabetics"[Mesh]) OR "Hyperglycemia"[Majr]) OR "Insulin Resistance"[Majr])) OR ((((((Pregestational diabetes[Text Word]) OR PGDM[Text Word]) OR Maternal diabetes[Text Word]) OR Gestational diabetes[Text Word]) OR GDM[Text Word]) OR Diabetic women[Text Word]) OR Diabetic pregnancies[Text Word]))) AND (((("Pregnancy"[Majr]) OR "Infant"[Majr]) OR "Fetus"[Majr]) OR ((Offspring*[Text Word]) OR Pregnancy[Text Word])) AND (("Heart Defects, Congenital"[Majr]) OR (((((((Congenital heart defect*[Text Word]) OR Congenital heart malformation*[Text Word]) OR CHD[Text Word]) OR Congenital heart disease*[Text Word]) OR Cardiac abnormalities[Text Word]) OR Cardiac abnormality[Text Word]) OR Cardiac defect*[Text Word]) OR Fetal heart[Text Word]) OR Fetal cardiac defect*[Text Word]) OR Foetal heart[Text Word]) OR Foetal cardiac defect*[Text Word])) | 632       |

## Embase Search Strategy

|                          | Aspect 1                      | Aspect 2                                                                                                                      | Aspect 3                                                                    |
|--------------------------|-------------------------------|-------------------------------------------------------------------------------------------------------------------------------|-----------------------------------------------------------------------------|
| "MeSH" / Subject Heading | congenital heart malformation | exp diabetes mellitus/ or exp hyperglycemia/ or exp insulin resistance/                                                       | exp high risk pregnancy/ or exp pregnancy/ or infant/ or newborn/ or fetus/ |
| Free text search         | (as above)                    | Pregestational diabetes OR PGDM OR Maternal diabetes OR Gestational diabetes OR GDM OR Diabetic women OR Diabetic pregnancies | (as above)                                                                  |

## Embase Search 2019-10-06

|        |                                                                                                                               | No. of articles |
|--------|-------------------------------------------------------------------------------------------------------------------------------|-----------------|
| #3     | #1 OR #2 (as above)                                                                                                           | 206,398         |
| #6     | #4 OR #5 (as above)                                                                                                           | 1,768,205       |
| #7     | exp diabetes mellitus/ or exp hyperglycemia/ or exp insulin resistance/                                                       | 1,005,513       |
| #8     | Pregestational diabetes OR PGDM OR Maternal diabetes OR Gestational diabetes OR GDM OR Diabetic women OR Diabetic pregnancies | 32,162          |
| #9     | #7 OR #8                                                                                                                      | 1,008,162       |
| #10    | #3 AND #6 AND #9                                                                                                              | 2,001           |
| LIMITS | English Language + Exclude MEDLINE journals                                                                                   | 182             |

## Maternal hypertension or preeclampsia and CHDs in offspring

## PubMed Search Strategy

|                  | Aspect 1                  | Aspect 2                                                                             | Aspect 3                     |
|------------------|---------------------------|--------------------------------------------------------------------------------------|------------------------------|
| MeSH             | Heart defects, congenital | Hypertension OR Hypertension, pregnancy-induced                                      | Pregnancy OR Infant OR Fetus |
| Free text search | (as above)                | Maternal hypertension OR Maternal hypertensive disorder* OR Gestational hypertension | (as above)                   |

## PubMed Search 2019-10-06

|    |                                                                                                                           | No. of articles |
|----|---------------------------------------------------------------------------------------------------------------------------|-----------------|
| #3 | #1 OR #2 (as above)                                                                                                       | 181,349         |
| #4 | ("Hypertension"[Majr]) OR "Hypertension, Pregnancy-Induced"[Mesh]                                                         | 211,800         |
| #5 | ((Maternal hypertension[Text Word]) OR Maternal hypertensive disorder*[Text Word]) OR Gestational hypertension[Text Word] | 3,466           |
| #6 | #4 OR #5                                                                                                                  | 213,166         |

|     |                                                                                                                                                                                                                                                                                                                                                                                                                                                                                                                                                                                                                                                                                                                                                                                   |           |
|-----|-----------------------------------------------------------------------------------------------------------------------------------------------------------------------------------------------------------------------------------------------------------------------------------------------------------------------------------------------------------------------------------------------------------------------------------------------------------------------------------------------------------------------------------------------------------------------------------------------------------------------------------------------------------------------------------------------------------------------------------------------------------------------------------|-----------|
|     | ((("Hypertension"[Majr] OR "Hypertension, Pregnancy-Induced"[Mesh])) OR (((Maternal hypertension[Text Word] OR Maternal hypertensive disorder*[Text Word] OR Gestational hypertension[Text Word]))                                                                                                                                                                                                                                                                                                                                                                                                                                                                                                                                                                                |           |
| #9  | #7 OR #8 (as above)                                                                                                                                                                                                                                                                                                                                                                                                                                                                                                                                                                                                                                                                                                                                                               | 1,053,307 |
| #10 | #3 AND #6 AND #9<br>((((("Hypertension"[Majr] OR "Hypertension, Pregnancy-Induced"[Mesh])) OR (((Maternal hypertension[Text Word] OR Maternal hypertensive disorder*[Text Word] OR Gestational hypertension[Text Word])))) AND (((("Pregnancy"[Majr] OR "Infant"[Majr] OR "Fetus"[Majr])) OR ((Offspring*[Text Word] OR Pregnancy[Text Word])))) AND (("Heart Defects, Congenital"[Majr] OR (((((((Congenital heart defect*[Text Word] OR Congenital heart malformation*[Text Word] OR CHD[Text Word] OR Congenital heart disease*[Text Word] OR Cardiac abnormalities[Text Word] OR Cardiac abnormality[Text Word] OR Cardiac defect*[Text Word] OR Fetal heart[Text Word] OR Fetal cardiac defect*[Text Word] OR Foetal heart[Text Word] OR Foetal cardiac defect*[Text Word])) | 661       |

*Embase Search Strategy*

|                          | Aspect 1                      | Aspect 2                                                                             | Aspect 3                                                                    |
|--------------------------|-------------------------------|--------------------------------------------------------------------------------------|-----------------------------------------------------------------------------|
| "MeSH" / Subject Heading | congenital heart malformation | exp hypertension/ or exp "eclampsia and preeclampsia"/                               | exp high risk pregnancy/ or exp pregnancy/ or infant/ or newborn/ or fetus/ |
| Free text search         | (as above)                    | Maternal hypertension OR Maternal hypertensive disorder* OR Gestational hypertension | (as above)                                                                  |

*Embase Search 2019-10-06*

|        |                                                                                      | No. of articles |
|--------|--------------------------------------------------------------------------------------|-----------------|
| #3     | #1 OR #2 (as above)                                                                  | 206,398         |
| #6     | #4 OR #5 (as above)                                                                  | 1,768,205       |
| #7     | exp hypertension/ or exp "eclampsia and preeclampsia"/                               | 735,885         |
| #8     | Maternal hypertension OR Maternal hypertensive disorder* OR Gestational hypertension | 18,442          |
| #9     | #7 OR #8                                                                             | 736,285         |
| #10    | #3 AND #6 AND #9                                                                     | 2,637           |
| LIMITS | English Language + Exclude MEDLINE journals                                          | 270             |

**Maternal dyslipidemia and CHDs in offspring***PubMed Search Strategy*

|                  | Aspect 1                  | Aspect 2                           | Aspect 3                     |
|------------------|---------------------------|------------------------------------|------------------------------|
| MeSH             | Heart defects, congenital | Dyslipidemias OR Lipoproteins, HDL | Pregnancy OR Infant OR Fetus |
| Free text search | (as above)                | HDL OR Dyslipidemia*               | (as above)                   |

*PubMed Search 2019-10-06*

|     |                                                                                                                                                                                                                                                                                                                                                                                                                                                                                                                                                                                                                                                                                                                   | No. of articles |
|-----|-------------------------------------------------------------------------------------------------------------------------------------------------------------------------------------------------------------------------------------------------------------------------------------------------------------------------------------------------------------------------------------------------------------------------------------------------------------------------------------------------------------------------------------------------------------------------------------------------------------------------------------------------------------------------------------------------------------------|-----------------|
| #3  | #1 OR #2 (as above)                                                                                                                                                                                                                                                                                                                                                                                                                                                                                                                                                                                                                                                                                               | 181,349         |
| #4  | ("Dyslipidemias"[Majr] OR "Lipoproteins, HDL"[Majr]                                                                                                                                                                                                                                                                                                                                                                                                                                                                                                                                                                                                                                                               | 66,228          |
| #5  | (Dyslipidemia*[Text Word] OR HDL[Text Word]                                                                                                                                                                                                                                                                                                                                                                                                                                                                                                                                                                                                                                                                       | 103,854         |
| #6  | #4 OR #5<br>((((("Dyslipidemias"[Majr] OR "Lipoproteins, HDL"[Majr])) OR ((Dyslipidemia*[Text Word] OR HDL[Text Word]))                                                                                                                                                                                                                                                                                                                                                                                                                                                                                                                                                                                           | 138,647         |
| #9  | #7 OR #8 (as above)                                                                                                                                                                                                                                                                                                                                                                                                                                                                                                                                                                                                                                                                                               | 1,053,307       |
| #10 | #3 AND #6 AND #9<br>(#52 AND #96 AND #62)<br>((((("Dyslipidemias"[Majr] OR "Lipoproteins, HDL"[Majr])) OR ((Dyslipidemia*[Text Word] OR HDL[Text Word])))) AND (((("Pregnancy"[Majr] OR "Infant"[Majr] OR "Fetus"[Majr])) OR ((Offspring*[Text Word] OR Pregnancy[Text Word])))) AND (("Heart Defects, Congenital"[Majr] OR (((((((Congenital heart defect*[Text Word] OR Congenital heart malformation*[Text Word] OR CHD[Text Word] OR Congenital heart disease*[Text Word] OR Cardiac abnormalities[Text Word] OR Cardiac abnormality[Text Word] OR Cardiac defect*[Text Word] OR Fetal heart[Text Word] OR Fetal cardiac defect*[Text Word] OR Foetal heart[Text Word] OR Foetal cardiac defect*[Text Word])) | 87              |

*Embase Search Strategy*

|                          | Aspect 1                      | Aspect 2                                                                        | Aspect 3                                                                    |
|--------------------------|-------------------------------|---------------------------------------------------------------------------------|-----------------------------------------------------------------------------|
| "MeSH" / Subject Heading | congenital heart malformation | exp dyslipidemia/ or exp hypertriglyceridemia/ or exp high density lipoprotein/ | exp high risk pregnancy/ or exp pregnancy/ or infant/ or newborn/ or fetus/ |
| Free text search         | (as above)                    | HDL OR Dyslipidemia*                                                            | (as above)                                                                  |

*Embase Search 2019-10-06*

|        |                                                                                 | No. of articles |
|--------|---------------------------------------------------------------------------------|-----------------|
| #3     | #1 OR #2 (as above)                                                             | 206,398         |
| #6     | #4 OR #5 (as above)                                                             | 1,768,205       |
| #7     | exp dyslipidemia/ or exp hypertriglyceridemia/ or exp high density lipoprotein/ | 145,111         |
| #8     | HDL OR Dyslipidemia*                                                            | 166,506         |
| #9     | #7 OR #8                                                                        | 202,390         |
| #10    | #3 AND #6 AND #9                                                                | 187             |
| LIMITS | English Language + Exclude MEDLINE journals                                     | 17              |

Table S2: Newcastle-Ottawa Quality Assessment Scale – Case-control studies

| Selection                                                                     |                                                                                                                                              |   |
|-------------------------------------------------------------------------------|----------------------------------------------------------------------------------------------------------------------------------------------|---|
| 1. Is the case definition adequate?                                           | A. yes, with independent validation                                                                                                          | ☆ |
|                                                                               | B. yes, eg record linkage or based on self-reports                                                                                           |   |
|                                                                               | C. no description                                                                                                                            |   |
| 2. Representativeness of the cases                                            | A. consecutive or obviously representative series of cases                                                                                   | ☆ |
|                                                                               | B. potential for selection biases or not stated                                                                                              |   |
| 3. Selection of Controls                                                      | A. community controls                                                                                                                        | ☆ |
|                                                                               | B. hospital controls                                                                                                                         |   |
|                                                                               | C. no description                                                                                                                            |   |
| 4. Definition of Controls                                                     | A. no history of disease (endpoint)                                                                                                          | ☆ |
|                                                                               | B. no description of source                                                                                                                  |   |
| Comparability                                                                 |                                                                                                                                              |   |
| 1. Comparability of cases and controls on the basis of the design or analysis | A. study controls for _____<br>(Select the most important factor.)                                                                           | ☆ |
|                                                                               | B. study controls for any additional factor<br>(This criteria could be modified to indicate specific control for a second important factor.) | ☆ |
| Exposure                                                                      |                                                                                                                                              |   |
| 1. Ascertainment of exposure                                                  | A. secure record (eg surgical records)                                                                                                       | ☆ |
|                                                                               | B. structured interview where blind to case/control status                                                                                   | ☆ |
|                                                                               | C. interview not blinded to case/control status                                                                                              |   |
|                                                                               | D. written self-report or medical record only                                                                                                |   |
|                                                                               | E. no description                                                                                                                            |   |
| 2. Same method of ascertainment for cases and controls                        | A. yes                                                                                                                                       | ☆ |
|                                                                               | B. no                                                                                                                                        |   |
| 3. Non-Response rate                                                          | A. same rate for both groups                                                                                                                 | ☆ |
|                                                                               | B. non respondents described                                                                                                                 |   |
|                                                                               | C. rate different and no designation                                                                                                         |   |

Note: A study can be awarded a maximum of one star for each numbered item within the Selection and Exposure categories. A maximum of two stars can be given for Comparability.

Further explanations and manuals for the scale can be found at:  
[http://www.ohri.ca/programs/clinical\\_epidemiology/oxford.asp](http://www.ohri.ca/programs/clinical_epidemiology/oxford.asp)



Table S2 (continued): Newcastle-Ottawa Quality Assessment Scale – Cohort studies

| Selection                                                                   |                                                                                                                                                                  |   |
|-----------------------------------------------------------------------------|------------------------------------------------------------------------------------------------------------------------------------------------------------------|---|
| 1. Representativeness of the exposed cohort                                 | A. truly representative of the average _____ (describe) in the community                                                                                         | ☆ |
|                                                                             | B. somewhat representative of the average _____ in the community                                                                                                 | ☆ |
|                                                                             | C. selected group of users eg nurses, volunteers                                                                                                                 |   |
|                                                                             | D. no description of the derivation of the cohort                                                                                                                |   |
| 2. Selection of the non-exposed cohort                                      | A. drawn from the same community as the exposed cohort                                                                                                           | ☆ |
|                                                                             | B. drawn from a different source                                                                                                                                 |   |
|                                                                             | C. no description of the derivation of the non-exposed cohort                                                                                                    |   |
| 3. Ascertainment of exposure                                                | A. secure record (eg surgical records)                                                                                                                           | ☆ |
|                                                                             | B. structured interview                                                                                                                                          | ☆ |
|                                                                             | C. written self-report                                                                                                                                           |   |
|                                                                             | D. no description                                                                                                                                                |   |
| 4. Demonstration that outcome of interest was not present at start of study | A. yes                                                                                                                                                           | ☆ |
|                                                                             | B. no                                                                                                                                                            |   |
| Comparability                                                               |                                                                                                                                                                  |   |
| 1. Comparability of cohorts on the basis of the design or analysis          | A. study controls for _____ (Select the most important factor.)                                                                                                  | ☆ |
|                                                                             | B. study controls for any additional factor (This criteria could be modified to indicate specific control for a second important factor.)                        | ☆ |
| Outcome                                                                     |                                                                                                                                                                  |   |
| 1. Assessment of outcome                                                    | A. independent blind assessment                                                                                                                                  | ☆ |
|                                                                             | B. record linkage                                                                                                                                                | ☆ |
|                                                                             | C. self-report                                                                                                                                                   |   |
|                                                                             | D. no description                                                                                                                                                |   |
| 2. Was follow-up long enough for outcomes to occur                          | A. yes (select an adequate follow up period for outcome of interest)                                                                                             | ☆ |
|                                                                             | B. no                                                                                                                                                            |   |
| 3. Adequacy of follow up of cohorts                                         | A. complete follow up - all subjects accounted for                                                                                                               | ☆ |
|                                                                             | B. subjects lost to follow up unlikely to introduce bias - small number lost - > ____ % (select an adequate %) follow up, or description provided of those lost) | ☆ |
|                                                                             | C. follow up rate < ____% (select an adequate %) and no description of those lost                                                                                |   |
|                                                                             | D. no statement                                                                                                                                                  |   |

Note: A study can be awarded a maximum of one star for each numbered item within the Selection and Outcome categories. A maximum of two stars can be given for Comparability.

Further explanations and manuals for the scale can be found at:

[http://www.ohri.ca/programs/clinical\\_epidemiology/oxford.asp](http://www.ohri.ca/programs/clinical_epidemiology/oxford.asp)

Table S3: Characteristics of included studies

| Author/publication year | Country of study population | Study design          | Population size | Cases with CHDs | Included study population            | Plurality  | Maternal exposure                      | Sources of maternal exposure | NOS score |
|-------------------------|-----------------------------|-----------------------|-----------------|-----------------|--------------------------------------|------------|----------------------------------------|------------------------------|-----------|
| Hoang 2016 [17]         | USA (Texas)                 | Cohort                | 4 207 898       | 48 249          | Live births                          | All        | PGDM (not specified), GDM              | Registers                    | 8         |
| Persson 2019 [14]       | Sweden                      | Cohort                | 2 050 491       | 28 628          | Live births                          | Singletons | Obesity                                | Registers                    | 8         |
| Liu 2013 [19]           | Canada (excl. Quebec)       | Cohort                | 2 278 838       | 26 488          | Live births                          | All        | Obesity, DM1, DM2, hypertension        | Registers                    | 8         |
| Chou 2016 [46]          | Taiwan                      | Cohort                | 1 387 650       | 23 483          | Live births                          | All        | DM1, DM2, hypertension                 | Registers                    | 8         |
| Boyd 2017 [21]          | Denmark                     | Cohort                | 1 972 857       | 18 038          | Live births                          | Singletons | PE                                     | Registers                    | 8         |
| Auger 2015 [22]         | Canada (Quebec)             | Cohort                | 1 942 072       | 17 296          | Live births                          | All        | PE                                     | Registers                    | 8         |
| Ludvigsson 2018 [13]    | Sweden                      | Cohort                | 1 162 323       | 17 242          | Live births                          | Singletons | DM1                                    | Registers                    | 8         |
| Øyen 2016 [16]          | Denmark                     | Cohort                | 2 025 727       | 16 325          | Live births                          | Singletons | PGDM (DM1 or DM2), GDM                 | Registers                    | 8         |
| Blomberg 2010 [30]      | Sweden                      | Cohort                | 1 049 582       | 11 163          | Live births, stillbirths             | Not stated | Obesity                                | Registers                    | 8         |
| Fisher 2017 [20]        | USA                         | Case-control (NBDPS)  | 21 762          | 10 625          | Live births, stillbirths, terminated | Singletons | Untreated hypertension                 | Interviews                   | 8         |
| Leirgul 2016 [18]       | Norway                      | Cohort                | 914 427         | 10 575          | Live births, stillbirths, terminated | Singletons | PGDM (DM1, DM2 or unspecified DM), GDM | Registers                    | 8         |
| Block 2013 [29]         | USA (Florida)               | Case-control          | 1 124 370       | 9 314           | Live births                          | Singletons | Obesity                                | Registers                    | 7         |
| Mills 2010 [32]         | USA (New York State)        | Case-control (nested) | 63 696          | 7 392           | Live births                          | Singletons | Obesity                                | Medical records              | 7         |
| Cedergren 2003 [35]     | Sweden                      | Case-control          | 812 457         | 6 801           | Live births, stillbirths             | Not stated | Obesity                                | Registers                    | 7         |
| Gilboa 2010 [31]        | USA                         | Case-control (NBDPS)  | 12 113          | 6 440           | Live births, stillbirths             | Not stated | Obesity, obesity+GDM                   | Interviews                   | 8         |
| Correa 2008 [44]        | USA                         | Case-control (NBDPS)  | 17 925          | 4 621           | Live births                          | Not stated | PGDM (DM1 or DM2), GDM                 | Interviews                   | 8         |
| Vereczkey 2014 [41]     | Hungary                     | Case-control          | 41 713          | 3 562           | Live births                          | All        | PGDM (DM1 or DM2), hypertension        | Registers                    | 8         |

|                     |                             |                               |           |       |                                      |            |                                              |                                 |   |
|---------------------|-----------------------------|-------------------------------|-----------|-------|--------------------------------------|------------|----------------------------------------------|---------------------------------|---|
| Brodwall 2016 [48]  | Norway                      | Cohort                        | 914 703   | 2 473 | Live births, stillbirths, terminated | Singletons | PE                                           | Registers                       | 8 |
| Sharpe 2005 [47]    | Australia (South Australia) | Cohort                        | 282 260   | 2 418 | Live births, stillbirths             | Singletons | DM1, GDM (GDM or impaired glucose tolerance) | Interviews                      | 8 |
| Liu 2015 [39]       | China (Tianjin)             | Cohort                        | 90 796    | 1 817 | Live births                          | All        | Obesity, GDM                                 | Questionnaire / medical records | 8 |
| Brite 2014 [15]     | USA                         | Cohort (CSL)                  | 121 815   | 1 388 | Live births                          | Singletons | Obesity                                      | Medical records                 | 8 |
| Watkins 2001 [37]   | USA                         | Case-control (ABDCCS)         | 4 078     | 1 049 | Live births, stillbirths             | Not stated | Obesity                                      | Interviews                      | 7 |
| Agopian 2012 [40]   | USA (Texas)                 | Cohort                        | 3 806 299 | 563   | Live births, stillbirths, terminated | All        | Obesity, PGDM (not specified), GDM           | Registers                       | 8 |
| Rankin 2010 [33]    | England                     | Cohort                        | 41 013    | 341   | Live births, stillbirths, terminated | Singletons | Obesity                                      | Registers                       | 8 |
| Shaw 2008 [34]      | USA (California)            | Case-control                  | 1 359     | 323   | Live births, stillbirths, terminated | Not stated | Obesity                                      | Interviews                      | 8 |
| Kovalenko 2018 [42] | Russia (Murmansk)           | Cohort                        | 52 253    | 233   | Live births                          | Singletons | PGDM (DM1 or DM2)                            | Registers                       | 8 |
| Shaw 2000 [38]      | USA (California)            | Case-control                  | 2 033     | 202   | Live births, stillbirths             | Not stated | Obesity                                      | Interviews                      | 7 |
| Watkins 2003 [36]   | USA                         | Case-control (Atlanta BDRFSS) | 525       | 195   | Live births, stillbirths, terminated | Not stated | Obesity                                      | Interviews                      | 7 |
| Vinceti 2014 [43]   | Italy                       | Case-control (nested)         | 479 720   | 68    | Live births, stillbirths             | All        | PGDM (DM1 or DM2)                            | Registers                       | 8 |
| Erickson 1991 [45]  | USA                         | Case-control (ABDCCS)         | 7 900     | 35    | Live births, stillbirths             | Not stated | PGDM (not specified)                         | Interviews                      | 7 |

Note: Studies listed after number of CHD cases: studies with most cases first etc.

Abbreviations: ABDCCS, Atlanta Birth Defect Case-Control Study; BDRFSS, Birth Defects Risk Factor Surveillance Study; CHDs, congenital heart defects; CM, congenital malformations; CSL, The Consortium of Safe Labor; DM1, diabetes mellitus type 1; DM2, diabetes mellitus type 2; GDM, gestational diabetes mellitus; NBDPS, National Birth Defects Prevention Study; NOS, Newcastle Ottawa Scale; PE, preeclampsia; PGDM, pregestational diabetes.

Figure S1. Maternal metabolic disorders and risk of heterotaxia in the offspring

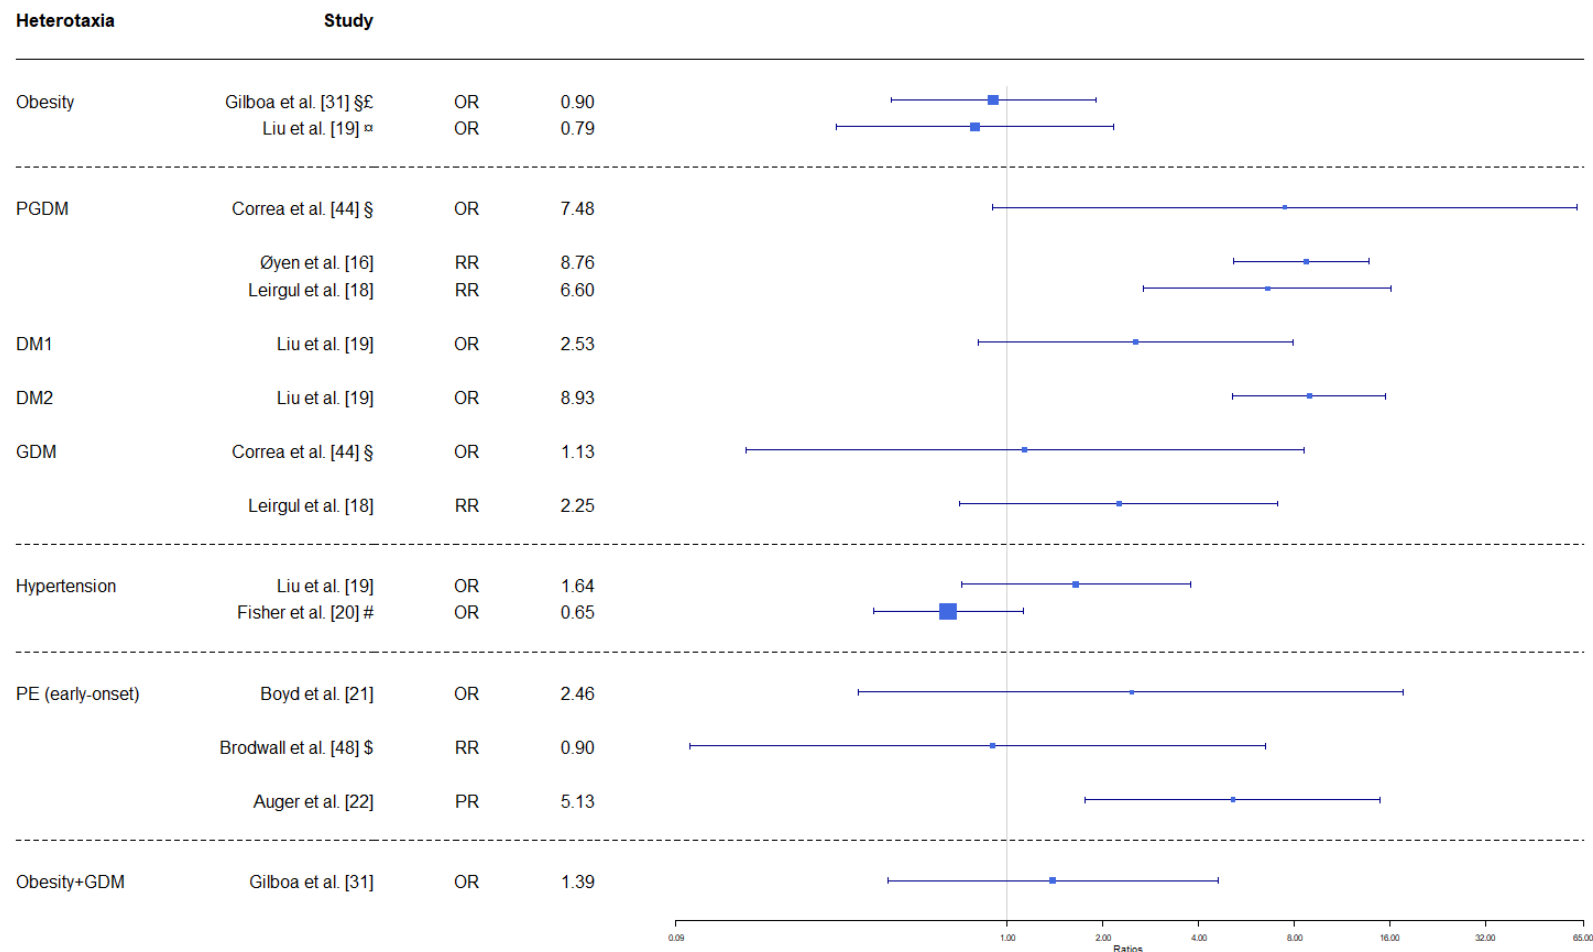

Note: obesity is defined as BMI  $\geq 30$  kg/m<sup>2</sup> unless other is stated; early-onset PE defined as debut before gestational week 34; PGDM are defined as DM1 or DM2; all risk estimates are adjusted unless other is stated; \*, not adjusted; §, isolated defects; ⌘, obesity defined from ICD-10 codes; £, BMI  $\geq 35$  kg/m<sup>2</sup>; €, BMI  $> 29$  kg/m<sup>2</sup>; †, BMI 35- $<40$  kg/m<sup>2</sup>; #, untreated hypertension; §, Brodwall et al. pooled early-onset PE and severe PE.

Abbreviations: BMI, body mass index; DM1, diabetes type 1; DM2, diabetes type 2; GDM, gestational diabetes; OR, odds ratio; PE, preeclampsia; PGDM, pregestational diabetes; PR, prevalence ratio; RR, risk ratio.

Figure S2. Maternal metabolic disorders and risk of univentricular heart in the offspring

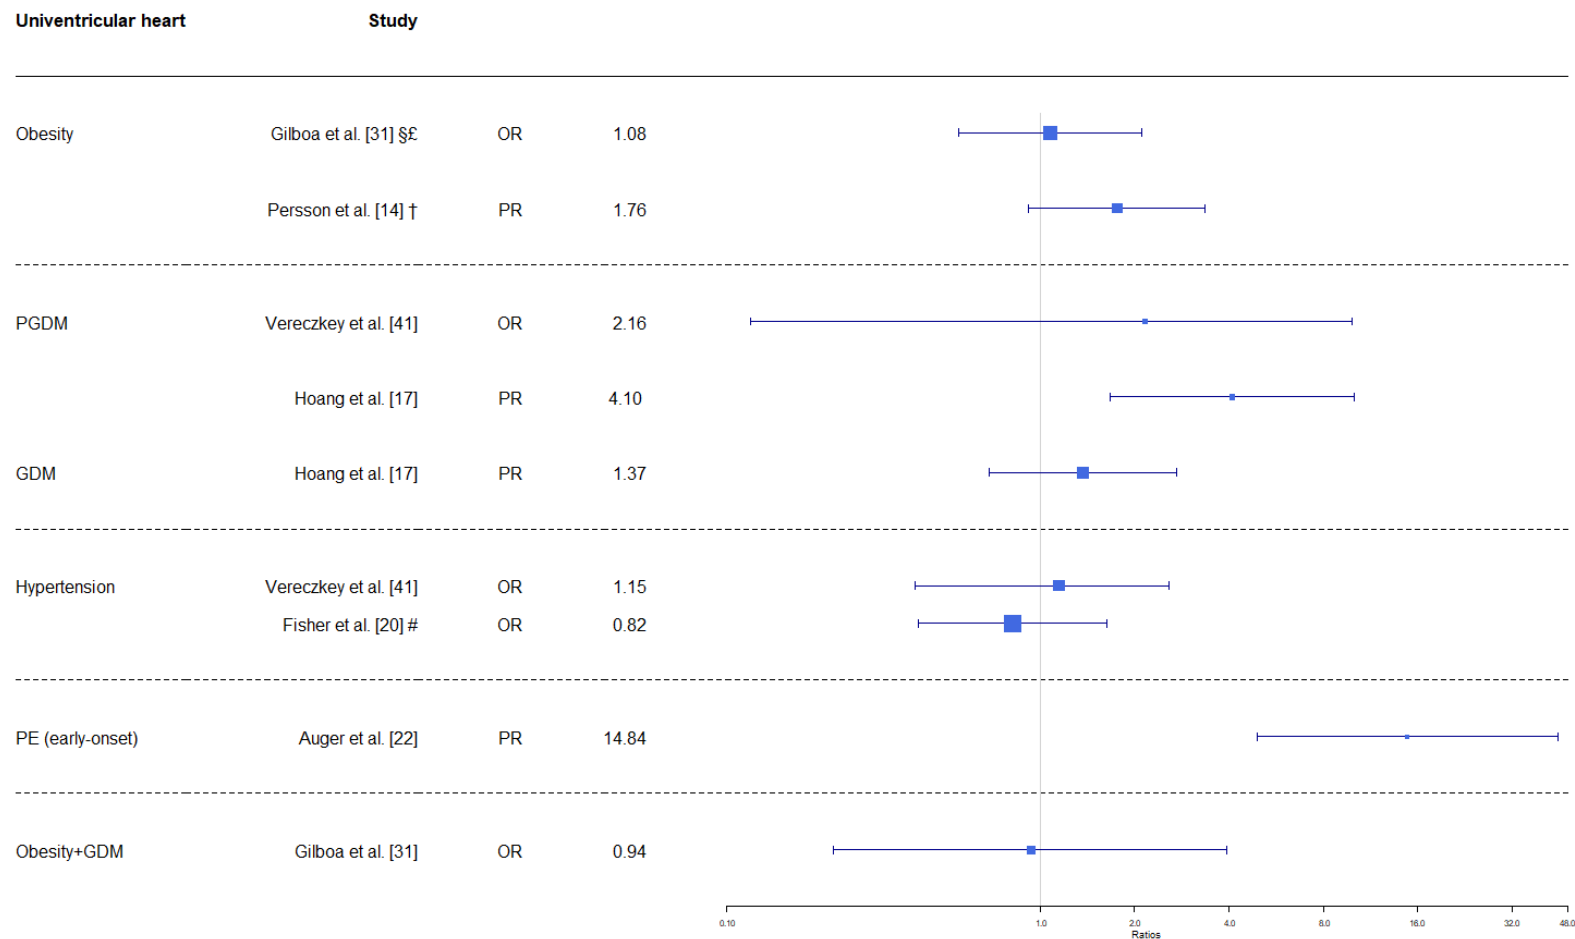

Note: obesity is defined as BMI  $\geq 30$  kg/m<sup>2</sup> unless other is stated; early-onset PE defined as debut before gestational week 34; PGDM are defined as DM1 or DM2; all risk estimates are adjusted unless other is stated; \*, not adjusted; §, BMI  $\geq 35$  kg/m<sup>2</sup>; †, BMI 35-<40 kg/m<sup>2</sup>; #, untreated hypertension. Abbreviations: BMI, body mass index; DM1, diabetes type 1; DM2, diabetes type 2; GDM, gestational diabetes; OR, odds ratio; PE, preeclampsia; PGDM, pregestational diabetes; PR, prevalence ratio; RR, risk ratio.

Figure S3. Maternal metabolic disorders and risk of conotruncal defects in the offspring

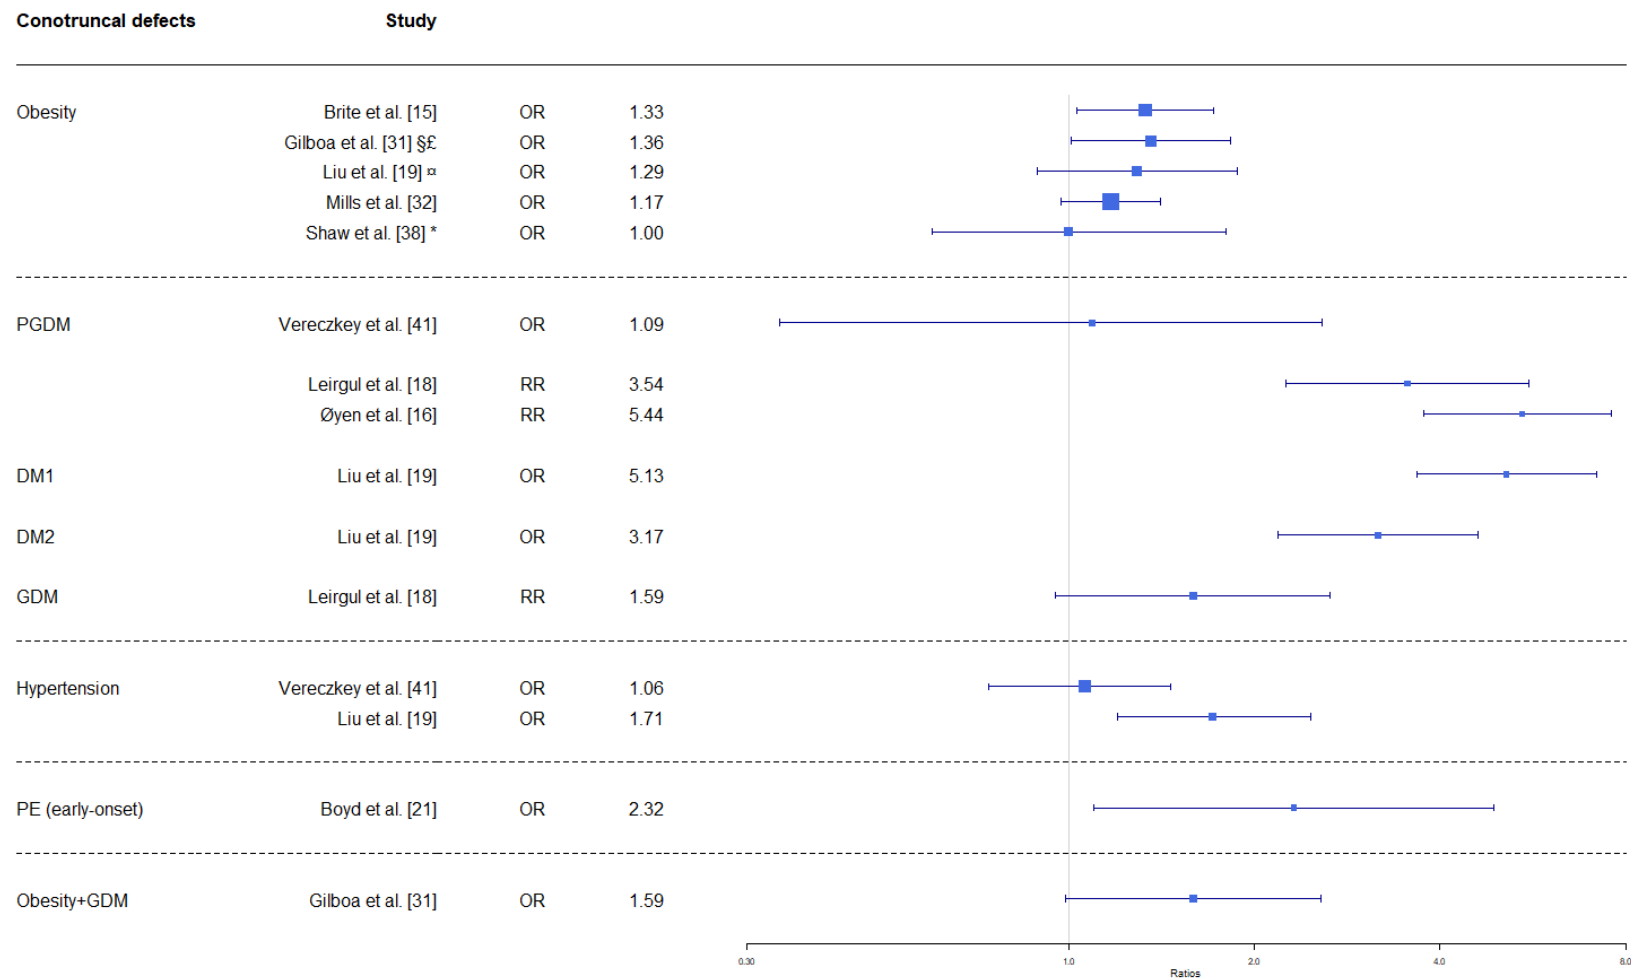

Note: obesity is defined as BMI  $\geq 30$  kg/m<sup>2</sup> unless other is stated; early-onset PE defined as debut before gestational week 34; PGDM are defined as DM1 or DM2; all risk estimates are adjusted unless other is stated; \*, not adjusted; §, isolated defects; ♂, obesity defined from ICD-10 codes; £, BMI  $\geq 35$  kg/m<sup>2</sup>.

Abbreviations: BMI, body mass index; DM1, diabetes type 1; DM2, diabetes type 2; GDM, gestational diabetes; OR, odds ratio; PE, preeclampsia; PGDM, pregestational diabetes; PR, prevalence ratio; RR, risk ratio.

Figure S4. Maternal metabolic disorders and risk of common truncus in the offspring

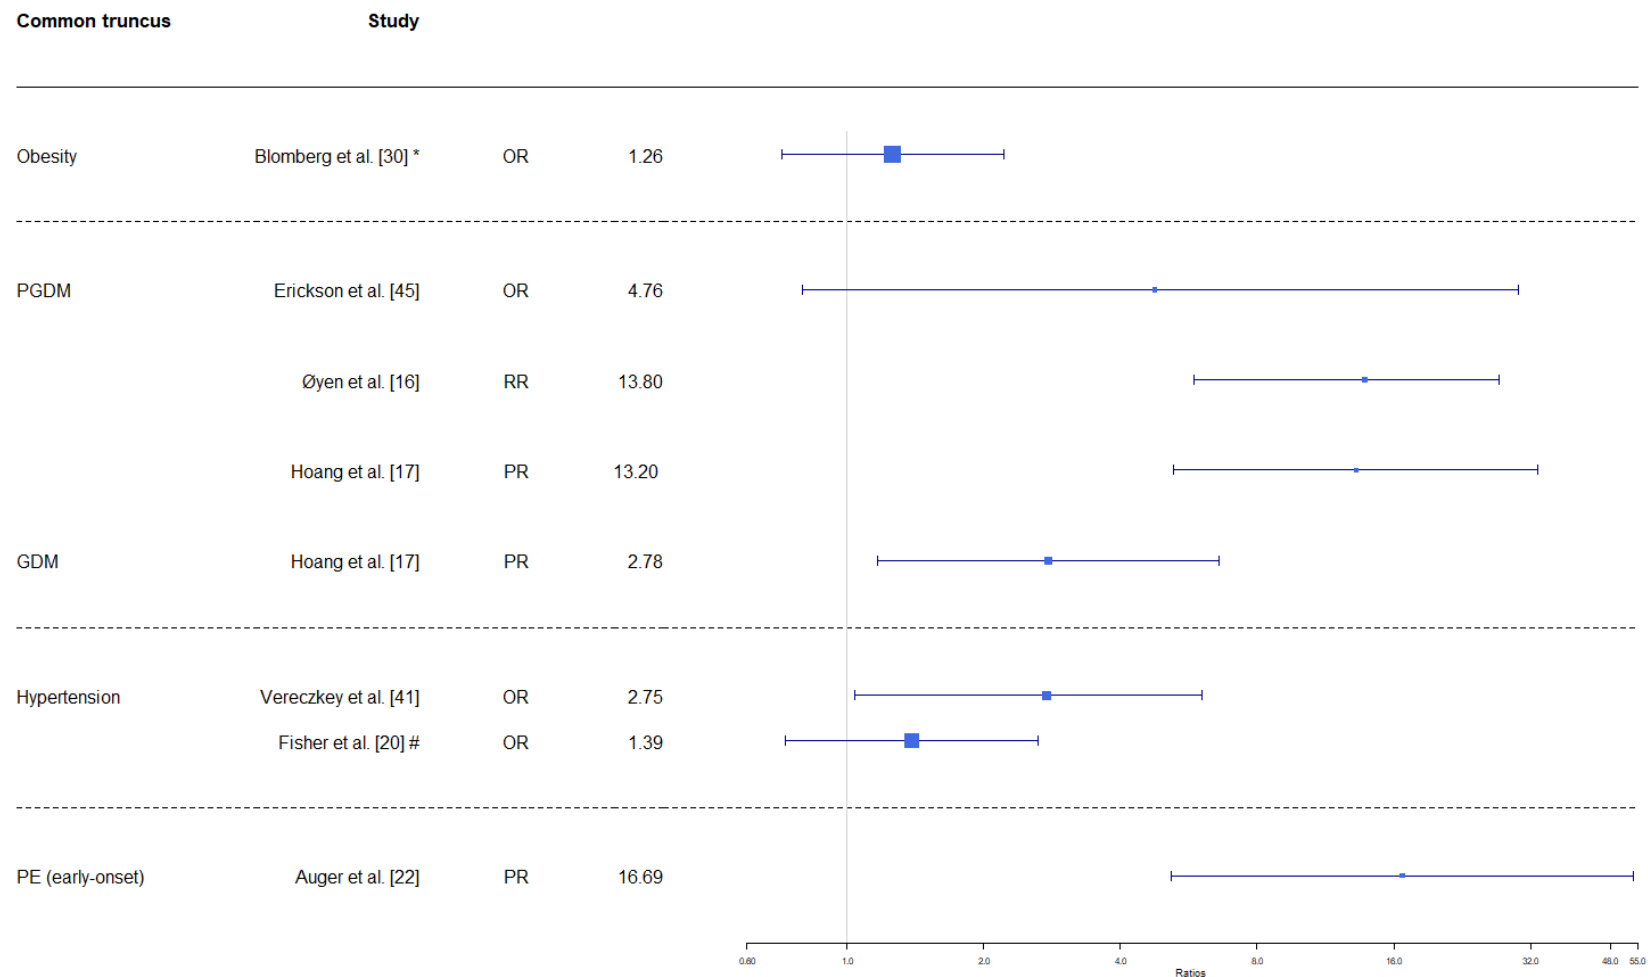

Note: obesity is defined as BMI  $\geq 30$  kg/m<sup>2</sup> unless other is stated; early-onset PE defined as debut before gestational week 34; PGDM are defined as DM1 or DM2; all risk estimates are adjusted unless other is stated; \*, not adjusted; #, untreated hypertension.

Abbreviations: BMI, body mass index; DM1, diabetes type 1; DM2, diabetes type 2; GDM, gestational diabetes; OR, odds ratio; PE, preeclampsia; PGDM, pregestational diabetes; PR, prevalence ratio; RR, risk ratio.

Supporting information



Figure S5. Maternal metabolic disorders and risk of transposition of the great arteries in the offspring

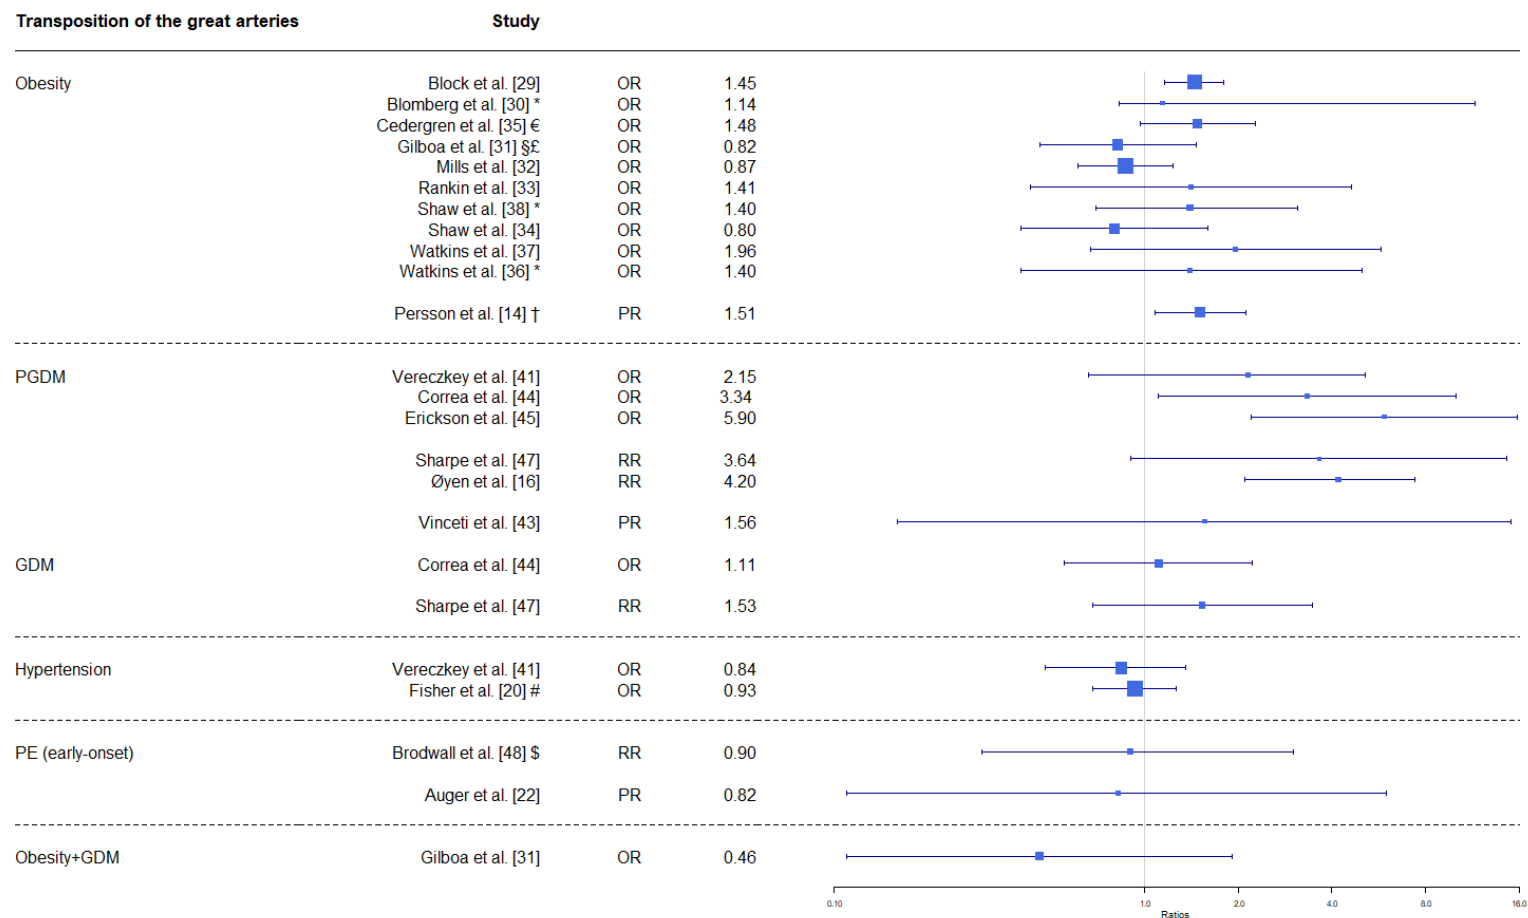

Note: obesity is defined as BMI  $\geq 30$  kg/m<sup>2</sup> unless other is stated; early-onset PE defined as debut before gestational week 34; PGDM are defined as DM1 or DM2; all risk estimates are adjusted unless other is stated; \*, not adjusted; \$, isolated defects; £, BMI  $\geq 35$  kg/m<sup>2</sup>; €, BMI  $> 29$  kg/m<sup>2</sup>; †, BMI 35-<40 kg/m<sup>2</sup>; #, untreated hypertension; \$, Brodwall et al. pooled early-onset PE and severe PE.

Abbreviations: BMI, body mass index; DM1, diabetes type 1; DM2, diabetes type 2; GDM, gestational diabetes; OR, odds ratio; PE, preeclampsia; PGDM, pregestational diabetes; PR, prevalence ratio; RR, risk ratio.

Figure S6. Maternal metabolic disorders and risk of Tetralogy of Fallot in the offspring

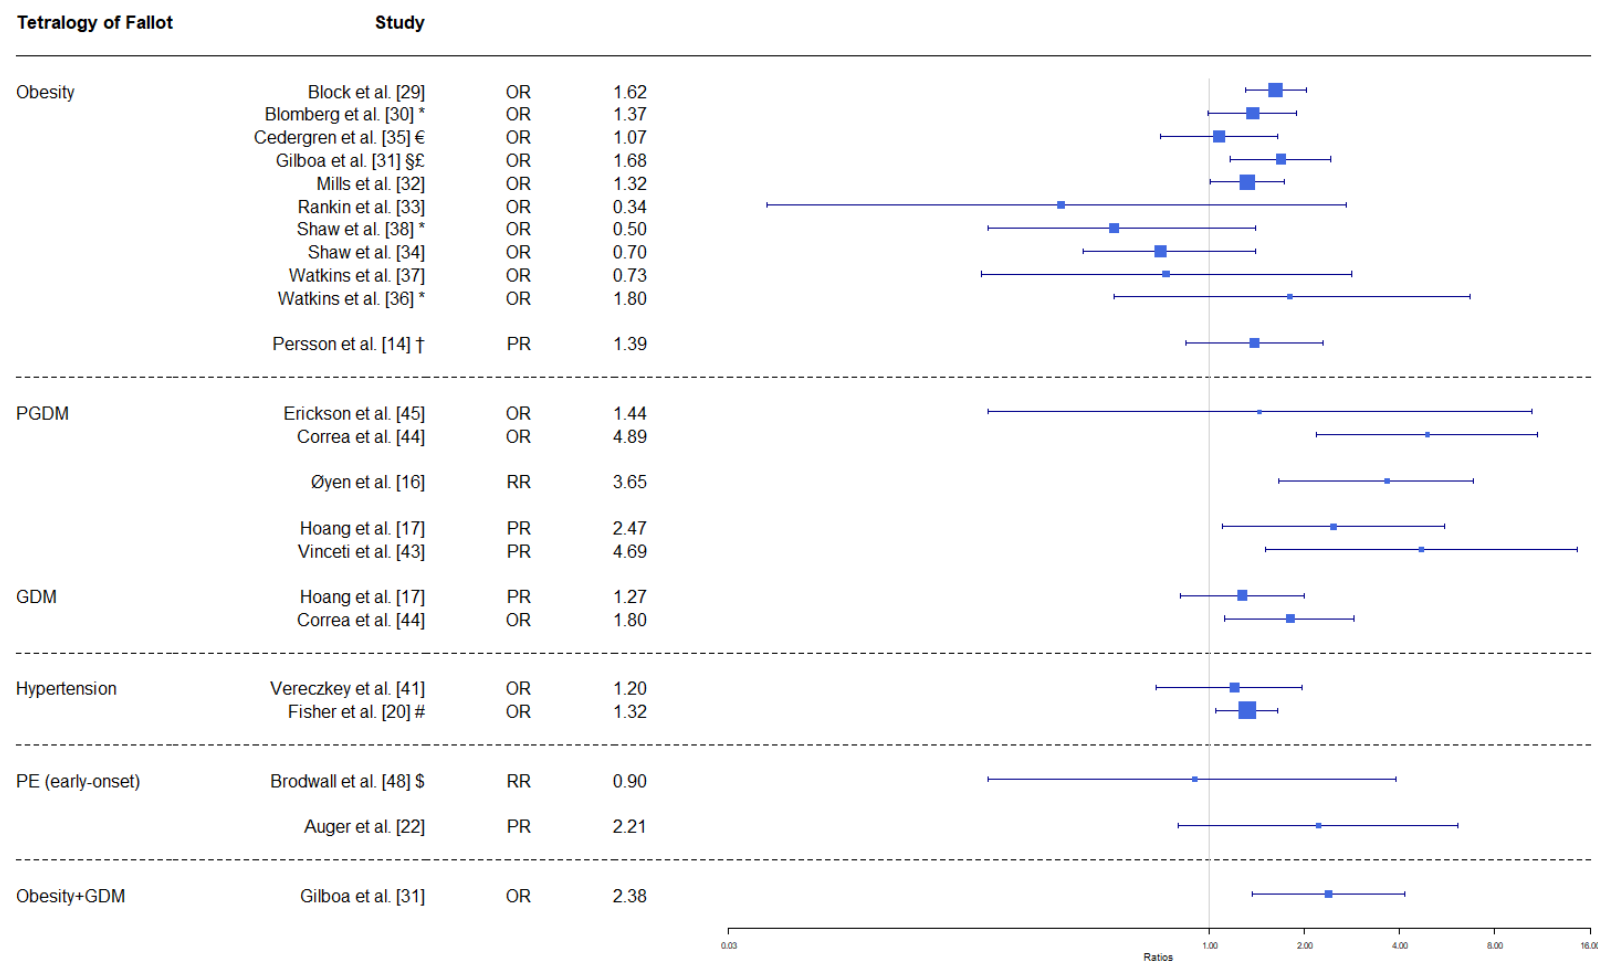

Note: obesity is defined as BMI  $\geq 30$  kg/m<sup>2</sup> unless other is stated; early-onset PE defined as debut before gestational week 34; PGDM are defined as DM1 or DM2; all risk estimates are adjusted unless other is stated; \*, not adjusted; \$, isolated defects; £, BMI  $\geq 35$  kg/m<sup>2</sup>; €, BMI  $> 29$  kg/m<sup>2</sup>; †, BMI 35-<40 kg/m<sup>2</sup>; #, untreated hypertension; \$, Brodwall et al. pooled early-onset PE and severe PE.

Abbreviations: BMI, body mass index; DM1, diabetes type 1; DM2, diabetes type 2; GDM, gestational diabetes; OR, odds ratio; PE, preeclampsia; PGDM, pregestational diabetes; PR, prevalence ratio; RR, risk ratio.

Supporting information

Figure S7. Maternal metabolic disorders and risk of double outlet right ventricle in the offspring

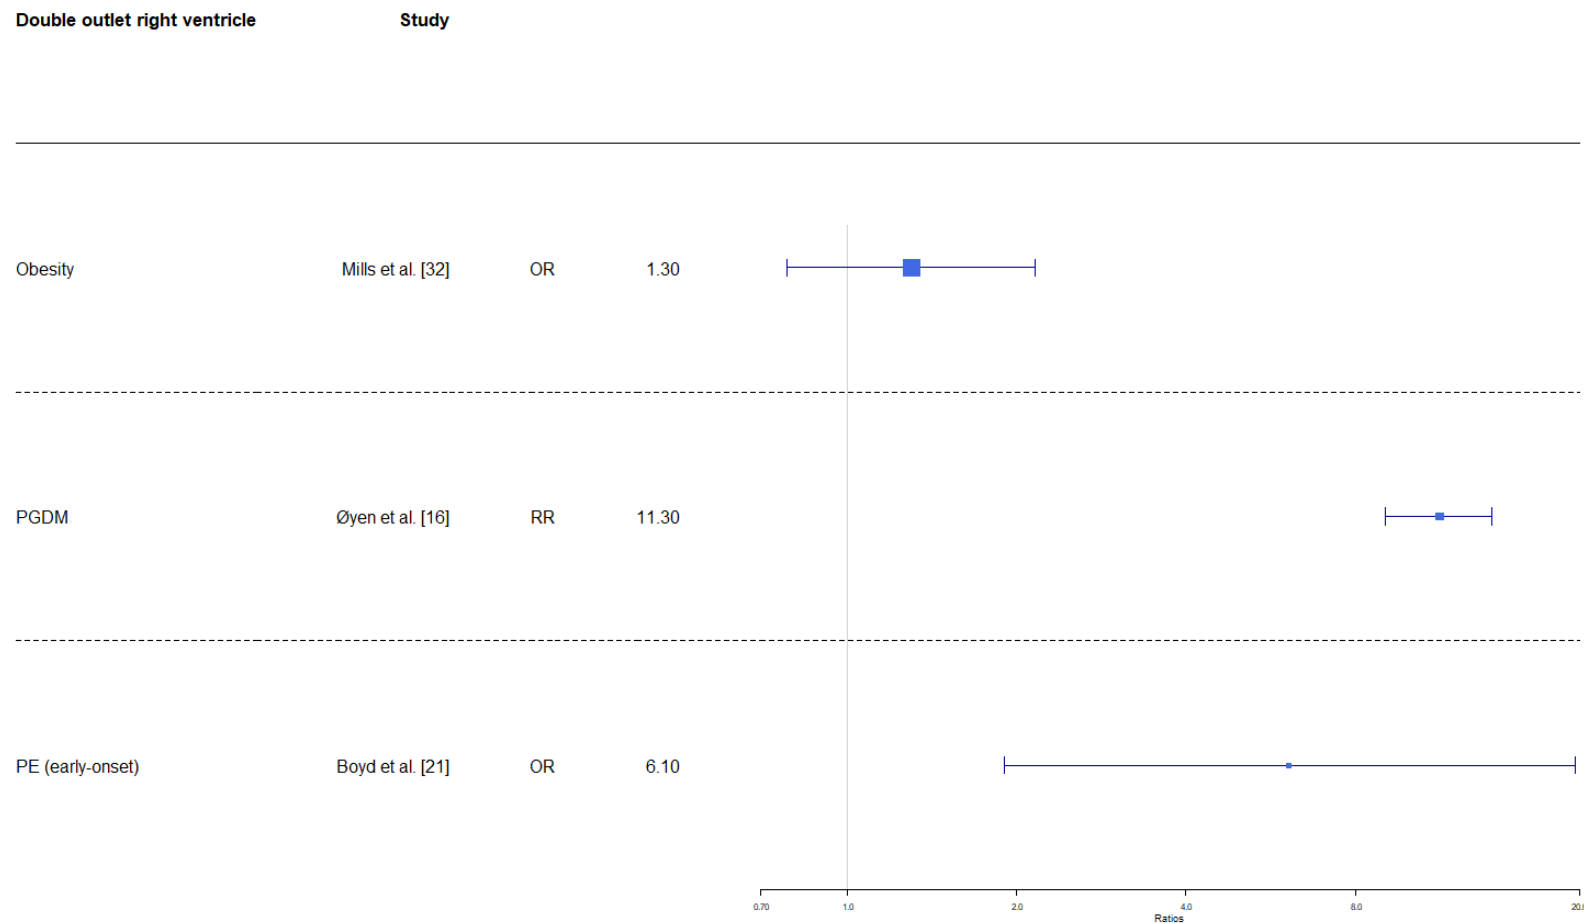

Note: obesity is defined as BMI  $\geq 30$  kg/m<sup>2</sup> unless other is stated; early-onset PE defined as debut before gestational week 34; PGDM are defined as DM1 or DM2; all risk estimates are adjusted unless other is stated; \*, not adjusted.

Abbreviations: BMI, body mass index; DM1, diabetes type 1; DM2, diabetes type 2; GDM, gestational diabetes; OR, odds ratio; PE, preeclampsia; PGDM, pregestational diabetes; PR, prevalence ratio; RR, risk ratio.

Figure S8. Maternal metabolic disorders and risk of aortic arch defects in the offspring

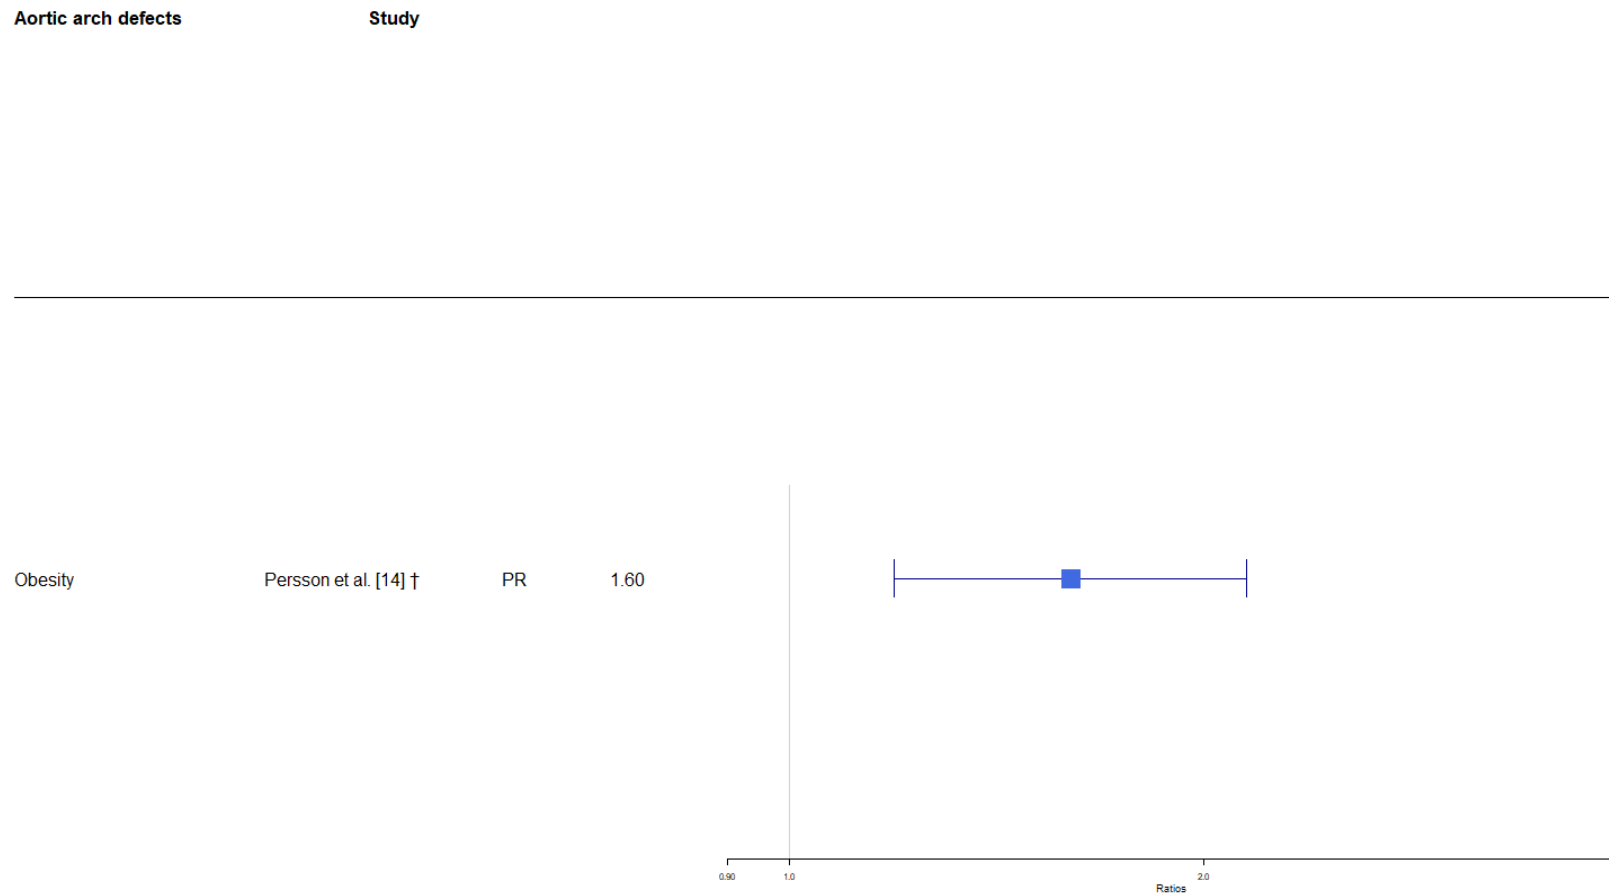

Note: obesity is defined as BMI  $\geq 30$  kg/m<sup>2</sup> unless other is stated; early-onset PE defined as debut before gestational week 34; PGDM are defined as DM1 or DM2; all risk estimates are adjusted unless other is stated; \*, not adjusted; †, BMI 35-<40 kg/m<sup>2</sup>.

Abbreviations: BMI, body mass index; DM1, diabetes type 1; DM2, diabetes type 2; GDM, gestational diabetes; OR, odds ratio; PE, preeclampsia; PGDM, pregestational diabetes; PR, prevalence ratio; RR, risk ratio.

Figure S9. Maternal metabolic disorders and risk of atrioventricular septal defects in the offspring

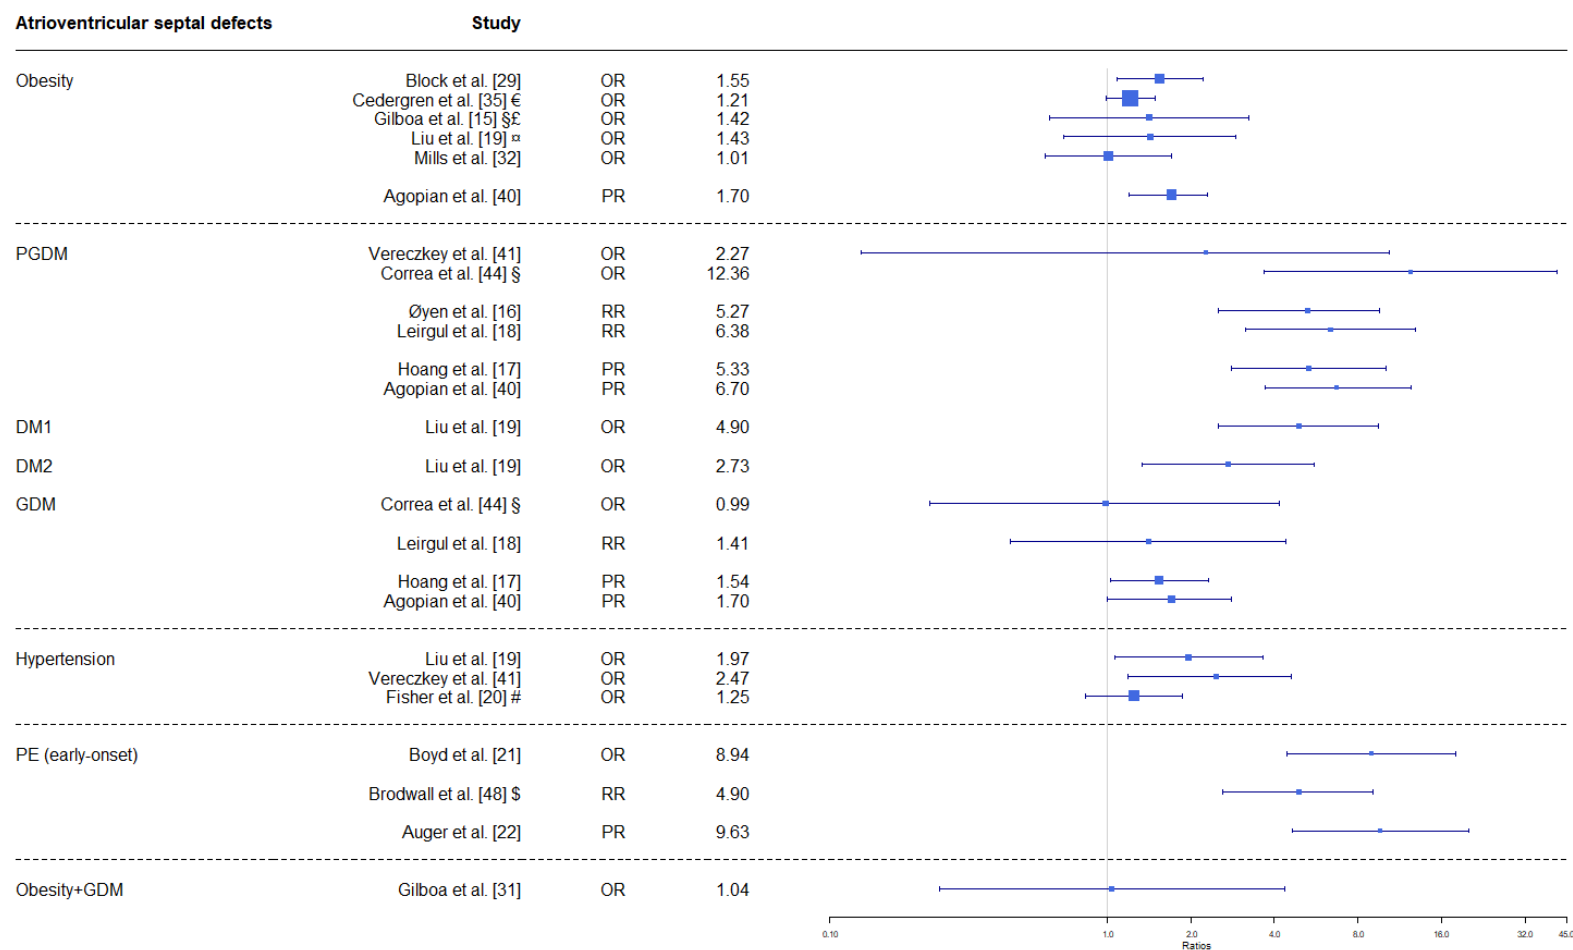

Note: obesity is defined as BMI  $\geq 30$  kg/m<sup>2</sup> unless other is stated; early-onset PE defined as debut before gestational week 34; PGDM are defined as DM1 or DM2; all risk estimates are adjusted unless other is stated; \*, not adjusted; \$, isolated defects; ♂, obesity defined from ICD-10 codes; £, BMI  $\geq 35$  kg/m<sup>2</sup>; €, BMI  $> 29$  kg/m<sup>2</sup>; #, untreated hypertension; §, Brodwall et al. pooled early-onset PE and severe PE.

Abbreviations: BMI, body mass index; DM1, diabetes type 1; DM2, diabetes type 2; GDM, gestational diabetes; OR, odds ratio; PE, preeclampsia; PGDM, pregestational diabetes; PR, prevalence ratio; RR, risk ratio.

Figure S10. Maternal metabolic disorders and risk of total anomalous pulmonary venous return in the offspring

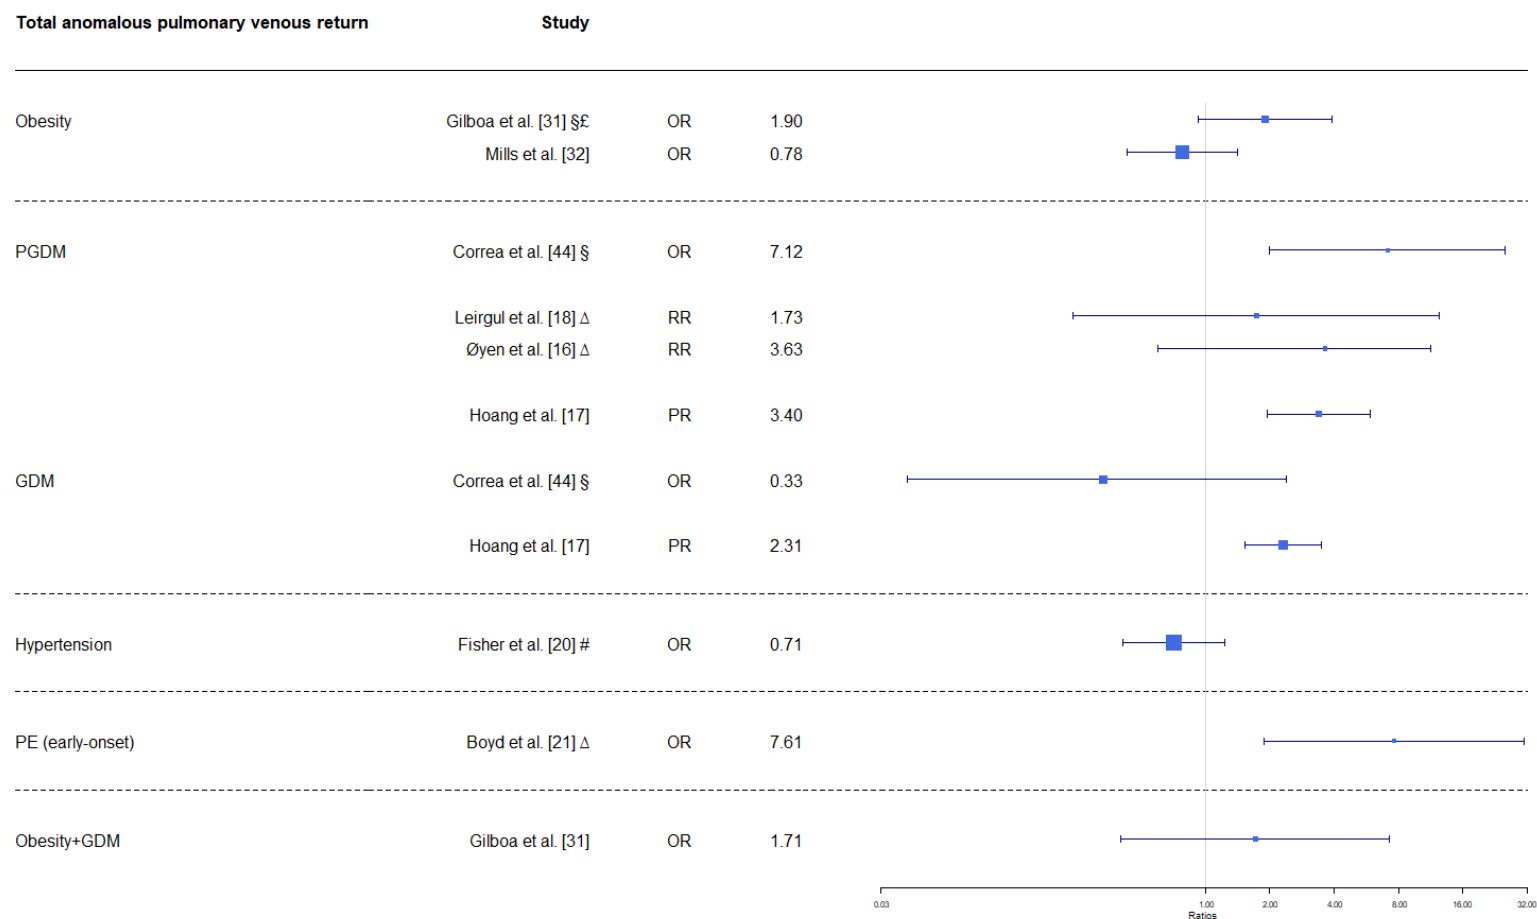

Note: obesity is defined as BMI  $\geq 30$  kg/m<sup>2</sup> unless other is stated; early-onset PE defined as debut before gestational week 34; PGDM are defined as DM1 or DM2; all risk estimates are adjusted unless other is stated; \*, not adjusted; §, isolated defects; £, BMI  $\geq 35$  kg/m<sup>2</sup>; Δ, estimates for anomalous pulmonary venous return; #, untreated hypertension.

Abbreviations: BMI, body mass index; DM1, diabetes type 1; DM2, diabetes type 2; GDM, gestational diabetes; OR, odds ratio; PE, preeclampsia; PGDM, pregestational diabetes; PR, prevalence ratio; RR, risk ratio.

Supporting information

Figure S11. Maternal metabolic disorders and risk of left ventricular outflow tract obstruction in the offspring

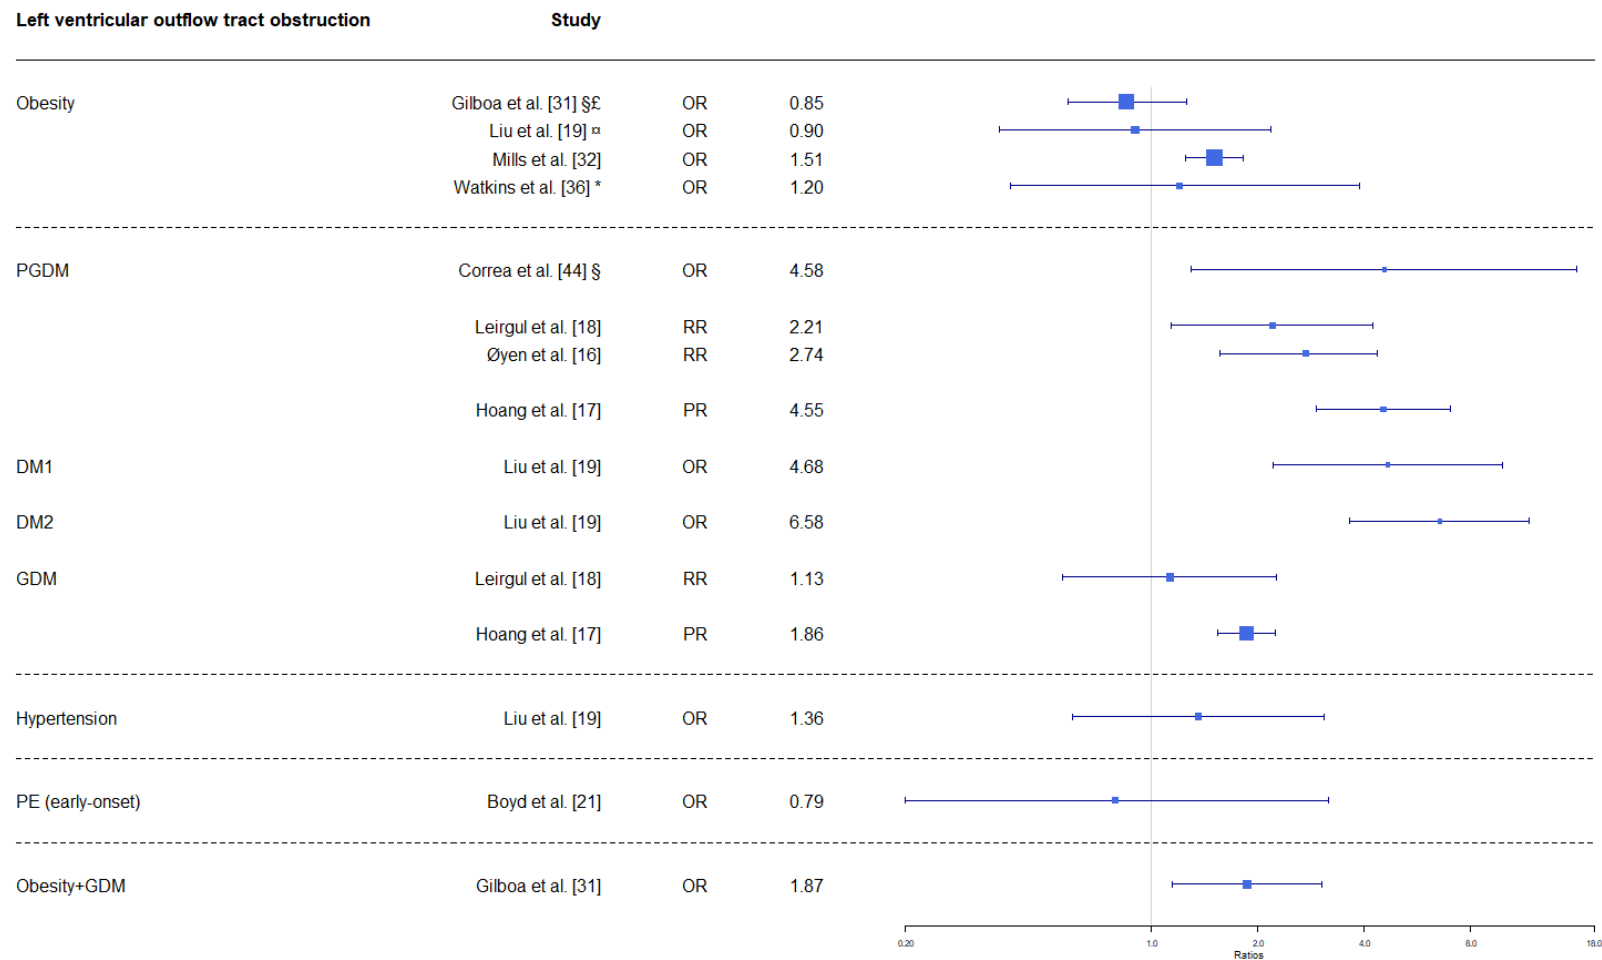

Note: obesity is defined as BMI  $\geq 30$  kg/m<sup>2</sup> unless other is stated; early-onset PE defined as debut before gestational week 34; PGDM are defined as DM1 or DM2; all risk estimates are adjusted unless other is stated; \*, not adjusted; §, isolated defects; ⌘, obesity defined from ICD-10 codes; £, BMI  $\geq 35$  kg/m<sup>2</sup>.

Abbreviations: BMI, body mass index; DM1, diabetes type 1; DM2, diabetes type 2; GDM, gestational diabetes; OR, odds ratio; PE, preeclampsia; PGDM, pregestational diabetes; PR, prevalence ratio; RR, risk ratio.

Figure S12. Maternal metabolic disorders and risk of hypoplastic left heart syndrome in the offspring

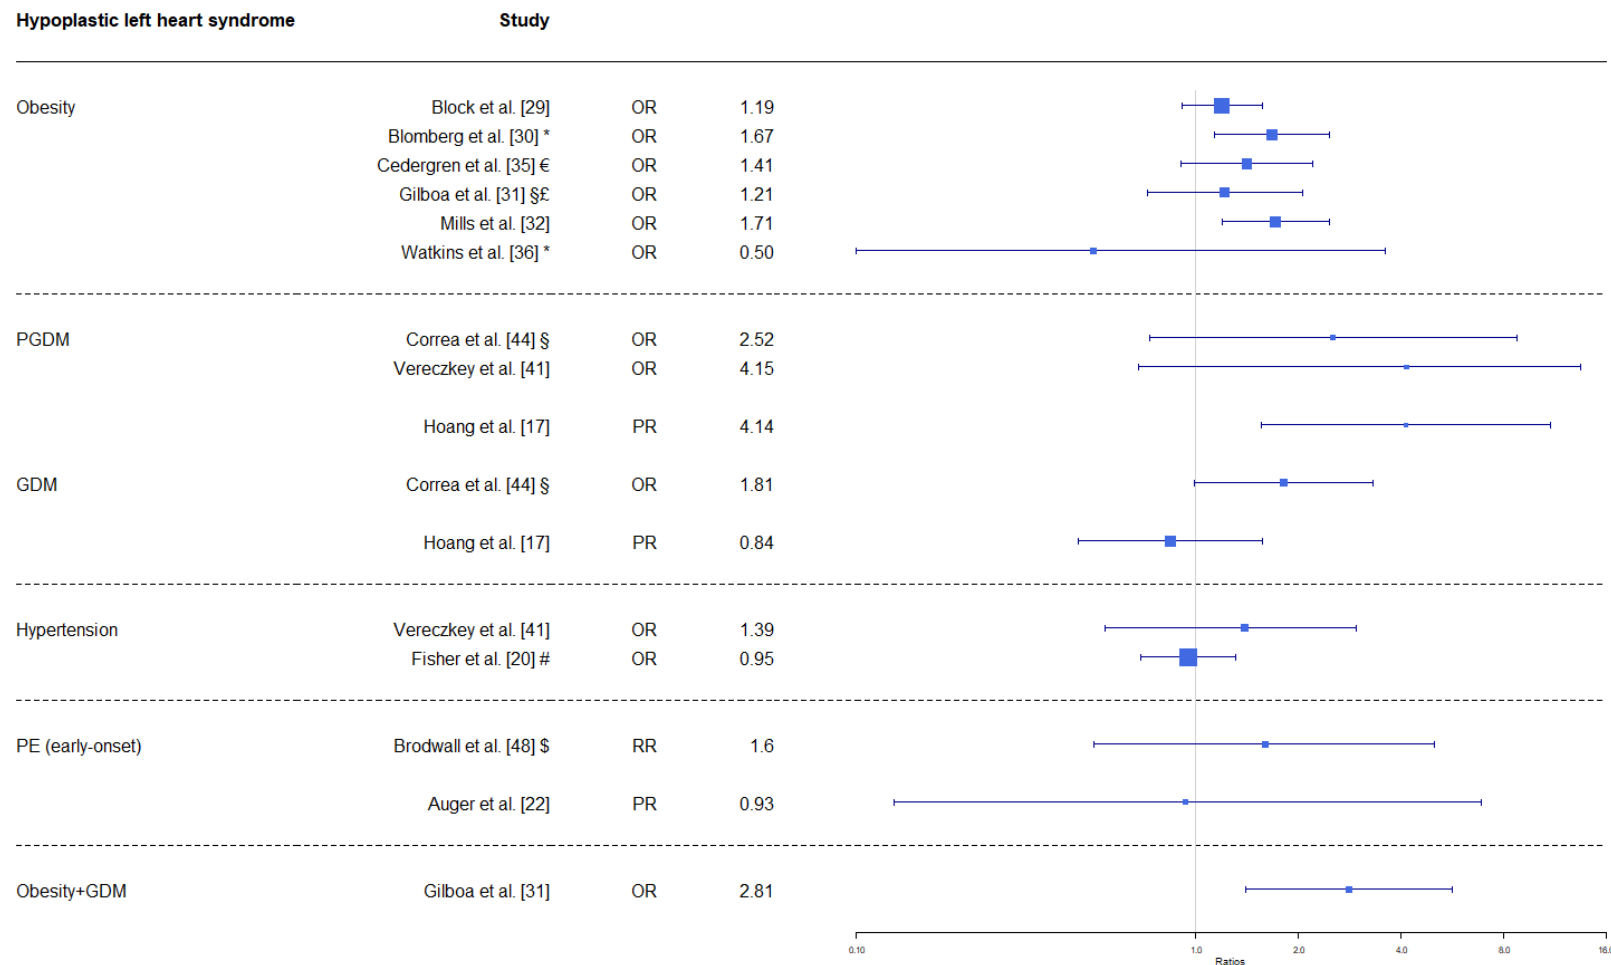

Note: obesity is defined as BMI  $\geq 30$  kg/m<sup>2</sup> unless other is stated; early-onset PE defined as debut before gestational week 34; PGDM are defined as DM1 or DM2; all risk estimates are adjusted unless other is stated; \*, not adjusted; §, isolated defects; £, BMI  $\geq 35$  kg/m<sup>2</sup>; €, BMI  $> 29$  kg/m<sup>2</sup>; #, untreated hypertension; \$, Brodwall et al. pooled early-onset PE and severe PE.

Abbreviations: BMI, body mass index; DM1, diabetes type 1; DM2, diabetes type 2; GDM, gestational diabetes; OR, odds ratio; PE, preeclampsia; PGDM, pregestational diabetes; PR, prevalence ratio; RR, risk ratio.

Supporting information



Figure S13. Maternal metabolic disorders and risk of coarctation of the Aorta in the offspring

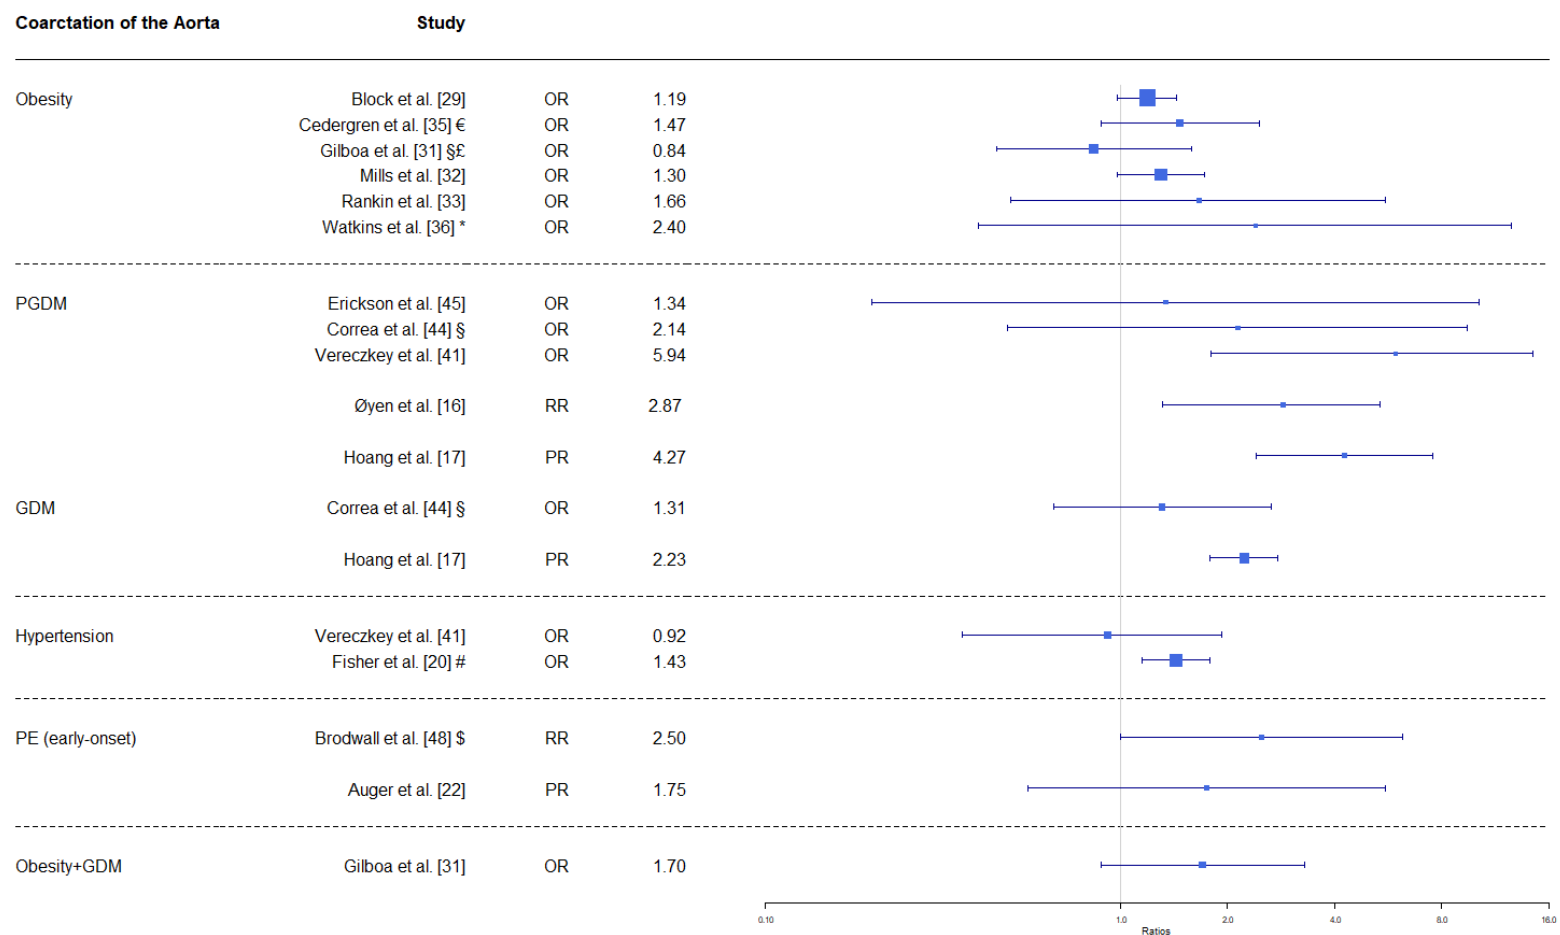

Note: obesity is defined as BMI  $\geq 30$  kg/m<sup>2</sup> unless other is stated; early-onset PE defined as debut before gestational week 34; PGDM are defined as DM1 or DM2; all risk estimates are adjusted unless other is stated; \*, not adjusted; §, isolated defects; £, BMI  $\geq 35$  kg/m<sup>2</sup>; €, BMI  $> 29$  kg/m<sup>2</sup>; #, untreated hypertension; \$, Brodwall et al. pooled early-onset PE and severe PE.

Abbreviations: BMI, body mass index; DM1, diabetes type 1; DM2, diabetes type 2; GDM, gestational diabetes; OR, odds ratio; PE, preeclampsia; PGDM, pregestational diabetes; PR, prevalence ratio; RR, risk ratio.

Figure S14. Maternal metabolic disorders and risk of aortic stenosis in the offspring

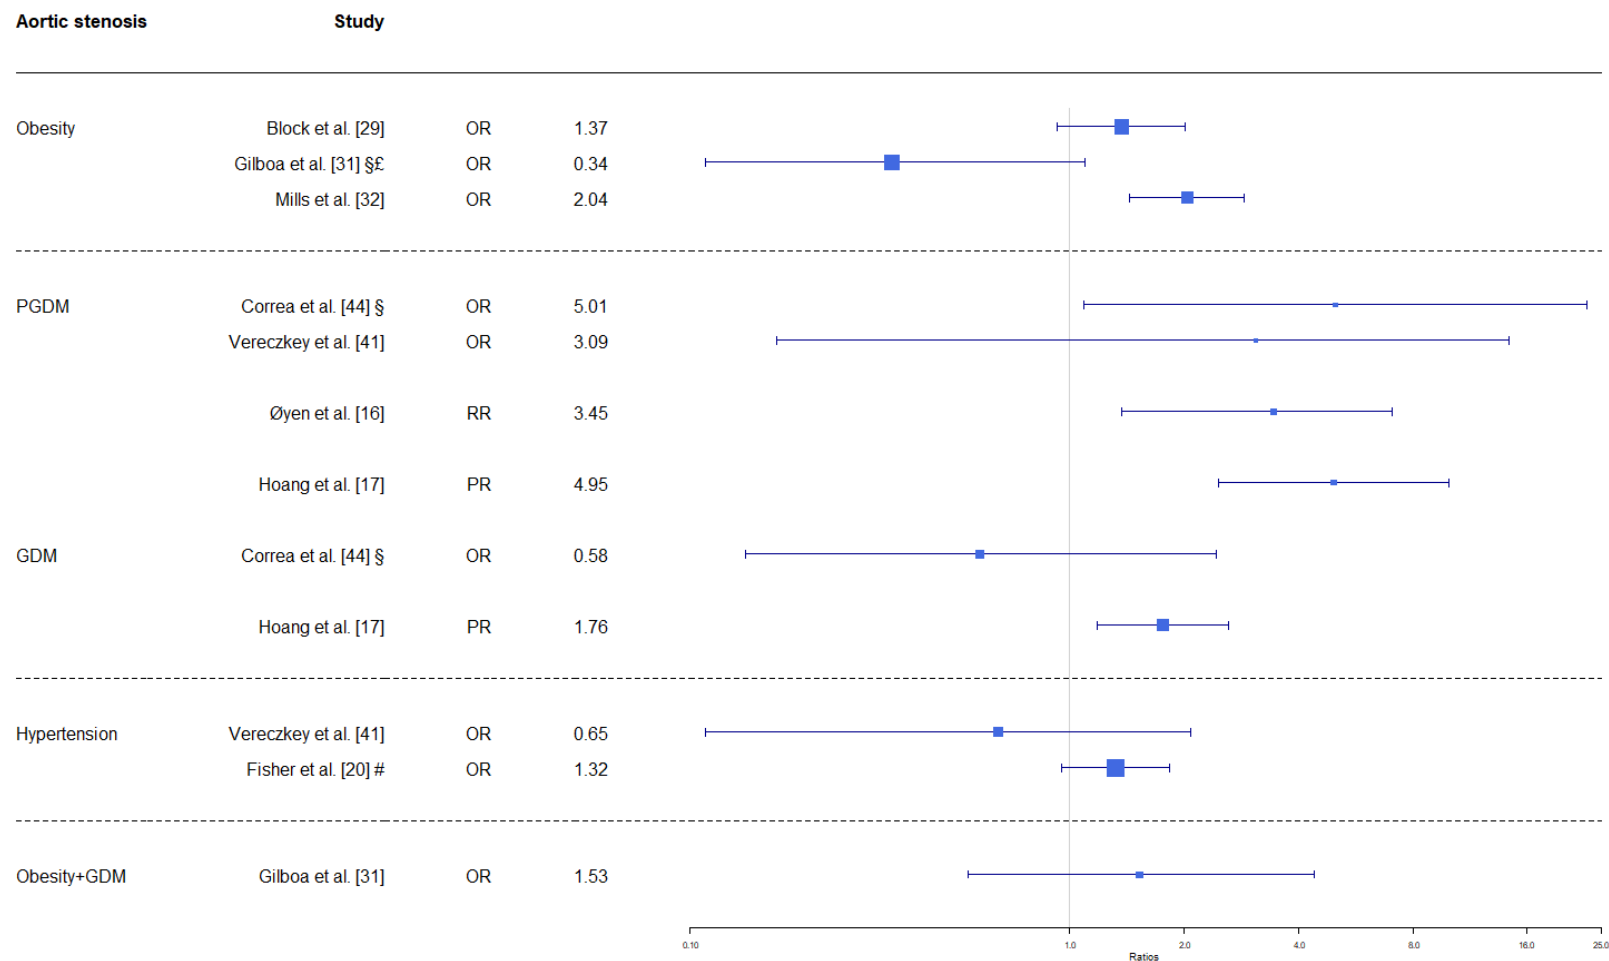

Note: obesity is defined as BMI  $\geq 30$  kg/m<sup>2</sup> unless other is stated; early-onset PE defined as debut before gestational week 34; PGDM are defined as DM1 or DM2; all risk estimates are adjusted unless other is stated; \*, not adjusted; §, isolated defects; £, BMI  $\geq 35$  kg/m<sup>2</sup>; #, untreated hypertension.

Abbreviations: BMI, body mass index; DM1, diabetes type 1; DM2, diabetes type 2; GDM, gestational diabetes; OR, odds ratio; PE, preeclampsia; PGDM, pregestational diabetes; PR, prevalence ratio; RR, risk ratio.

Figure S15. Maternal metabolic disorders and risk of right ventricular outflow tract obstruction in the offspring

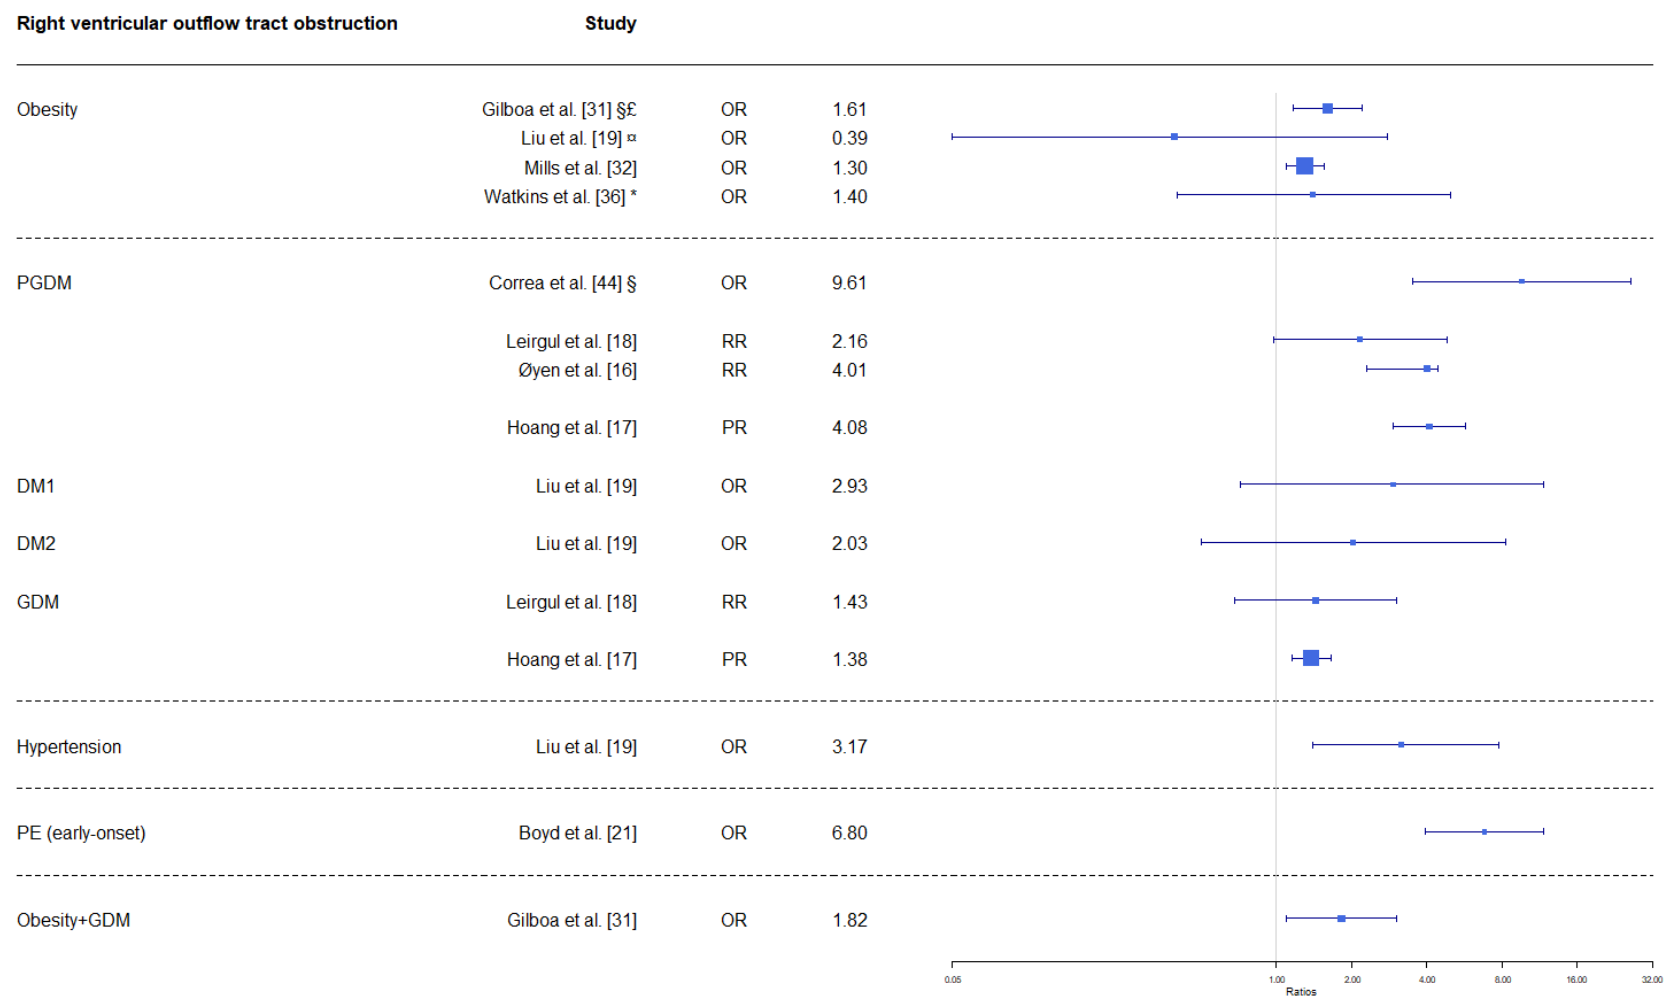

Note: obesity is defined as BMI  $\geq 30$  kg/m<sup>2</sup> unless other is stated; early-onset PE defined as debut before gestational week 34; PGDM are defined as DM1 or DM2; all risk estimates are adjusted unless other is stated; \*, not adjusted; §, isolated defects; £, BMI  $\geq 35$  kg/m<sup>2</sup>; #, untreated hypertension.

Abbreviations: BMI, body mass index; DM1, diabetes type 1; DM2, diabetes type 2; GDM, gestational diabetes; OR, odds ratio; PE, preeclampsia; PGDM, pregestational diabetes; PR, prevalence ratio; RR, risk ratio.

Supporting information

Figure S16. Maternal metabolic disorders and risk of pulmonary valve stenosis in the offspring

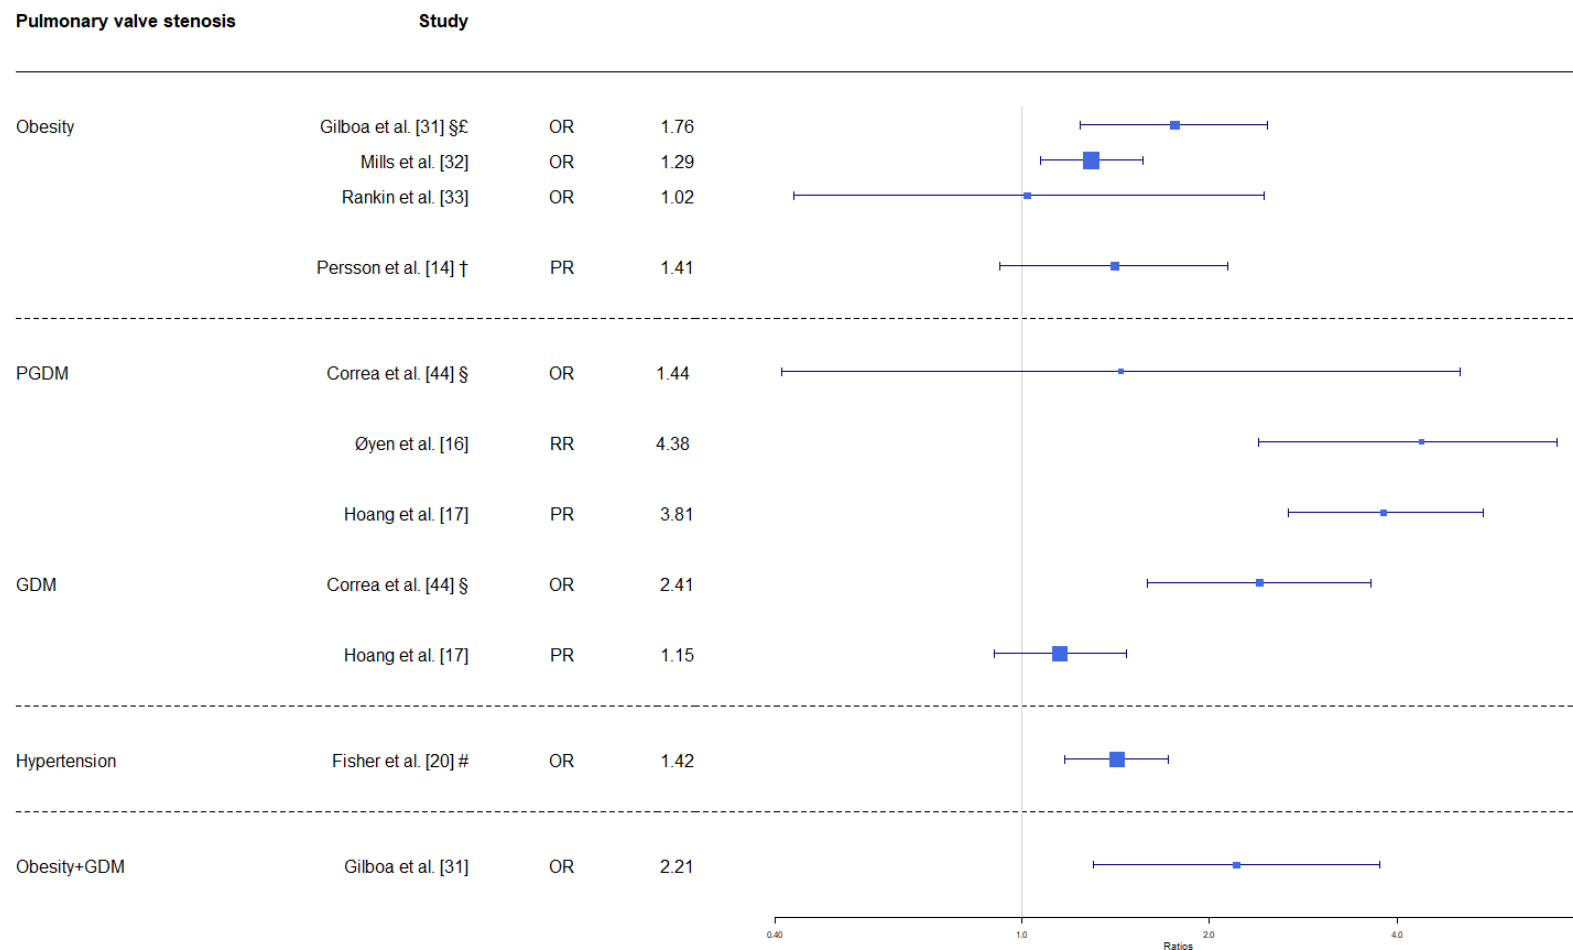

Note: obesity is defined as BMI  $\geq 30$  kg/m<sup>2</sup> unless other is stated; early-onset PE defined as debut before gestational week 34; PGDM are defined as DM1 or DM2; all risk estimates are adjusted unless other is stated; \*, not adjusted; §, isolated defects; £, BMI  $\geq 35$  kg/m<sup>2</sup>; †, BMI 35-<40 kg/m<sup>2</sup>; #, untreated hypertension. Abbreviations: BMI, body mass index; DM1, diabetes type 1; DM2, diabetes type 2; GDM, gestational diabetes; OR, odds ratio; PE, preeclampsia; PGDM, pregestational diabetes; PR, prevalence ratio; RR, risk ratio.

Figure S17. Maternal metabolic disorders and risk of Ebstein’s anomaly in the offspring

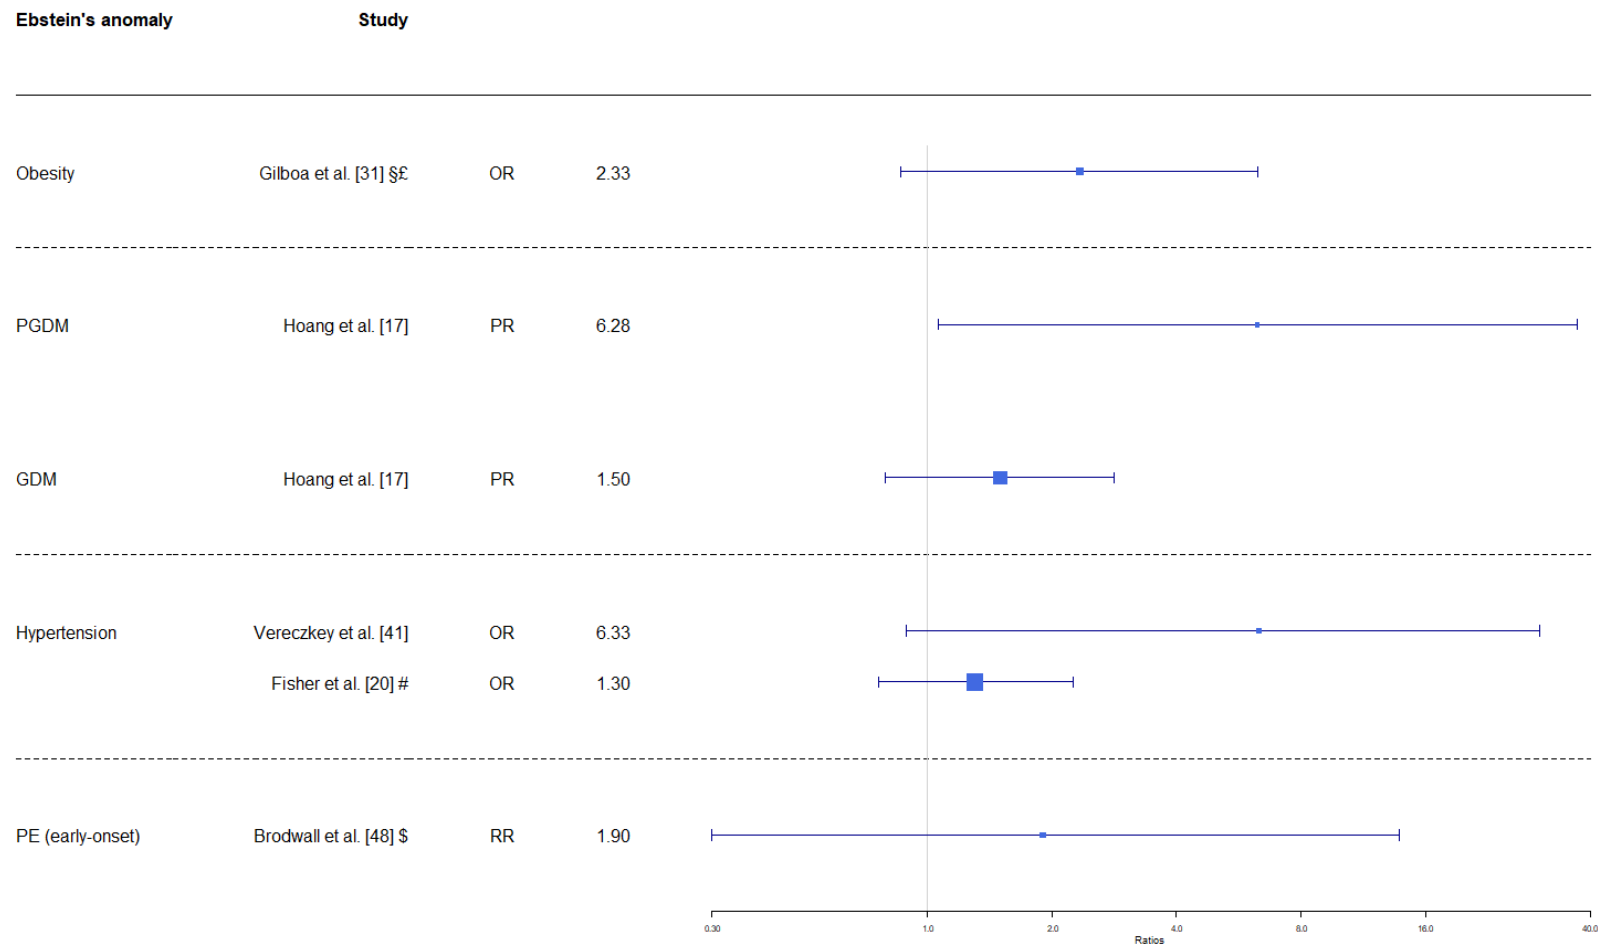

Note: obesity is defined as BMI ≥ 30 kg/m<sup>2</sup> unless other is stated; early-onset PE defined as debut before gestational week 34; PGDM are defined as DM1 or DM2; all risk estimates are adjusted unless other is stated; \*, not adjusted; §, isolated defects; £, BMI ≥ 35 kg/m<sup>2</sup>; #, untreated hypertension; \$, Brodwall et al. pooled early-onset PE and severe PE.

Abbreviations: BMI, body mass index; DM1, diabetes type 1; DM2, diabetes type 2; GDM, gestational diabetes; OR, odds ratio; PE, preeclampsia; PGDM, pregestational diabetes; PR, prevalence ratio; RR, risk ratio.

Supporting information

Figure S18. Maternal metabolic disorders and risk of septal defects in the offspring

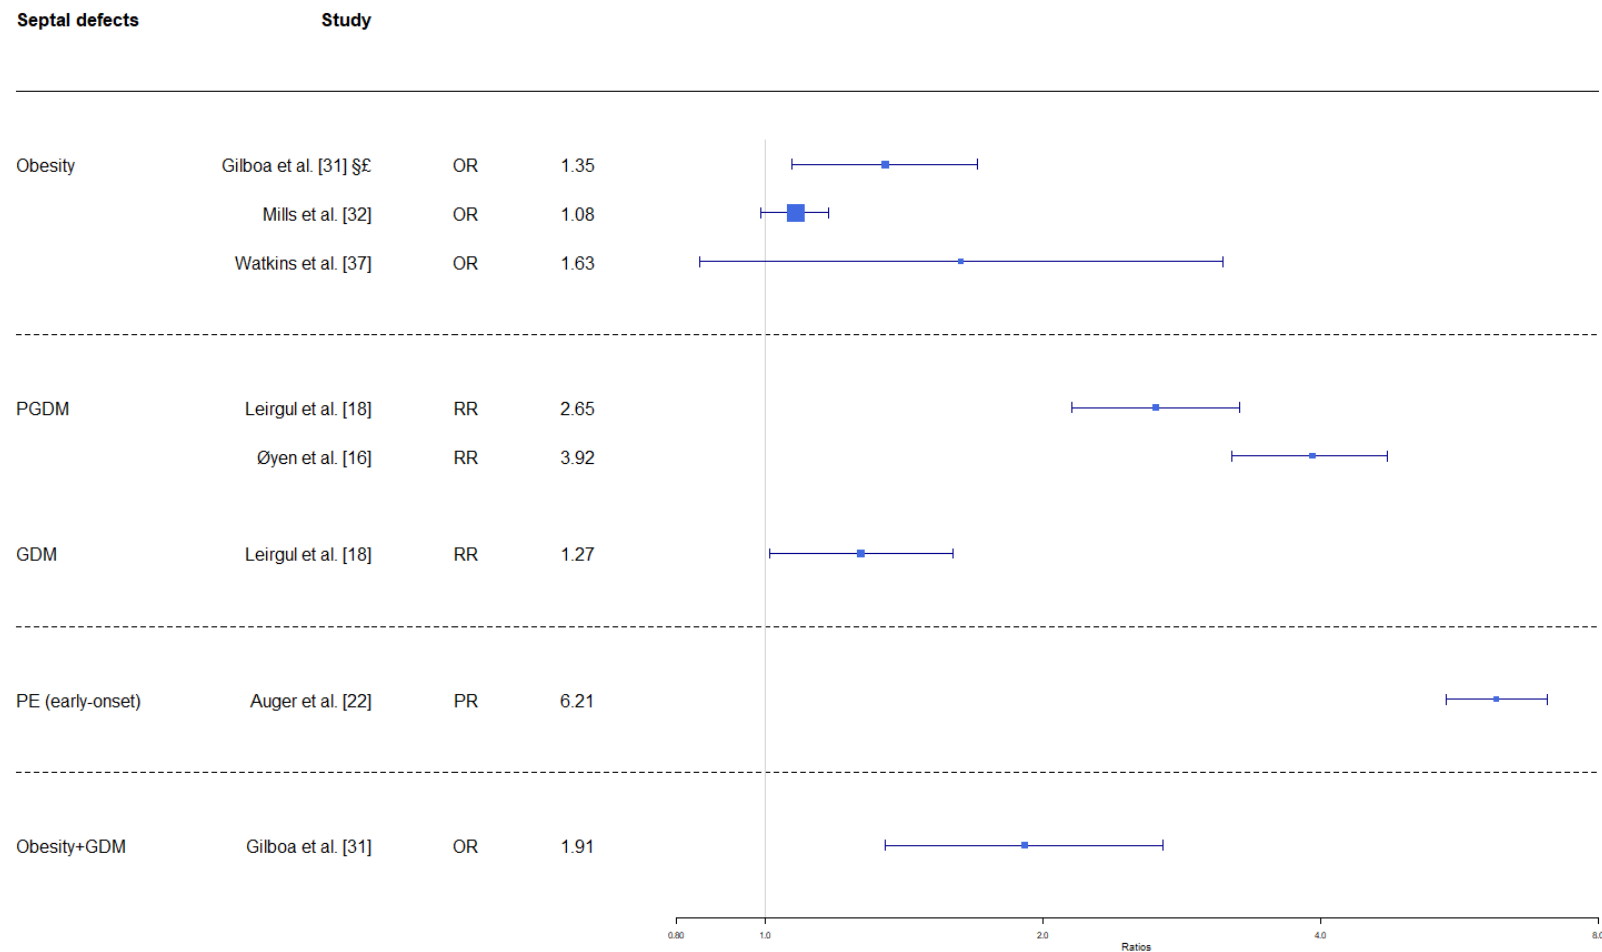

Note: obesity is defined as BMI ≥ 30 kg/m<sup>2</sup> unless other is stated; early-onset PE defined as debut before gestational week 34; PGDM are defined as DM1 or DM2; all risk estimates are adjusted unless other is stated; \*, not adjusted; §, isolated defects; £, BMI ≥ 35 kg/m<sup>2</sup>.

Abbreviations: BMI, body mass index; DM1, diabetes type 1; DM2, diabetes type 2; GDM, gestational diabetes; OR, odds ratio; PE, preeclampsia; PGDM, pregestational diabetes; PR, prevalence ratio; RR, risk ratio.

Figure S19. Maternal metabolic disorders and risk of ventricular septal defects in the offspring

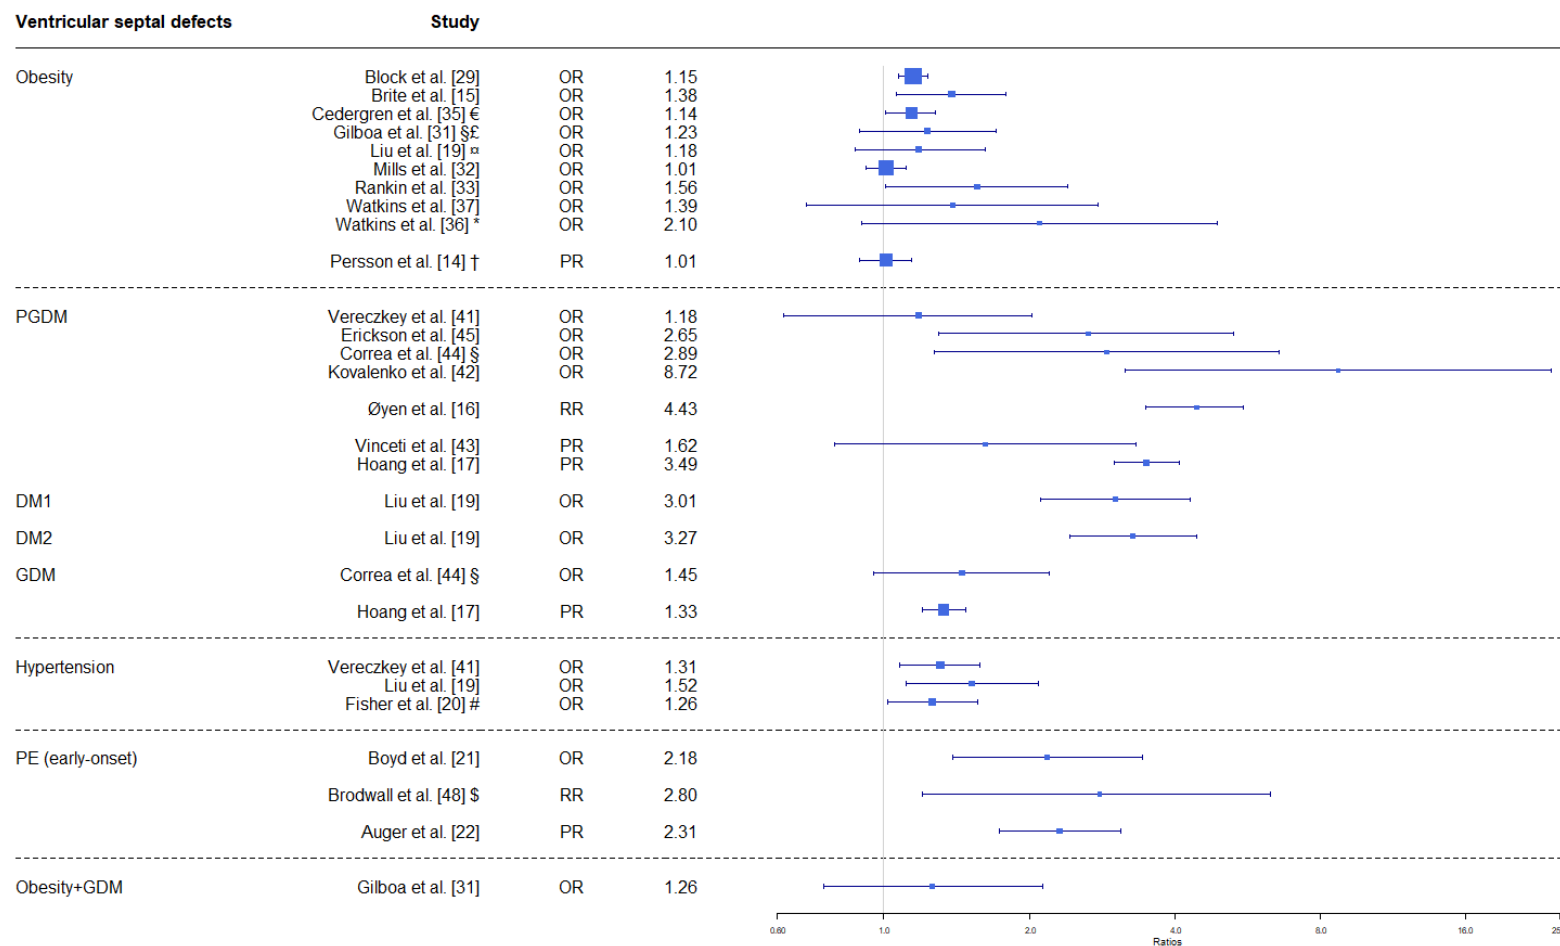

Note: obesity is defined as BMI ≥ 30 kg/m<sup>2</sup> unless other is stated; early-onset PE defined as debut before gestational week 34; PGDM are defined as DM1 or DM2; all risk estimates are adjusted unless other is stated; \*, not adjusted; §, isolated defects; ¨, obesity defined from ICD-10 codes; £, BMI ≥ 35 kg/m<sup>2</sup>; €, BMI > 29 kg/m<sup>2</sup>; †, BMI 35-<40 kg/m<sup>2</sup>; #, untreated hypertension; \$, Brodwall et al. pooled early-onset PE and severe PE.

Abbreviations: BMI, body mass index; DM1, diabetes type 1; DM2, diabetes type 2; GDM, gestational diabetes; OR, odds ratio; PE, preeclampsia; PGDM, pregestational diabetes; PR, prevalence ratio; RR, risk ratio.

Figure S20. Maternal metabolic disorders and risk of atrial septal defects in the offspring

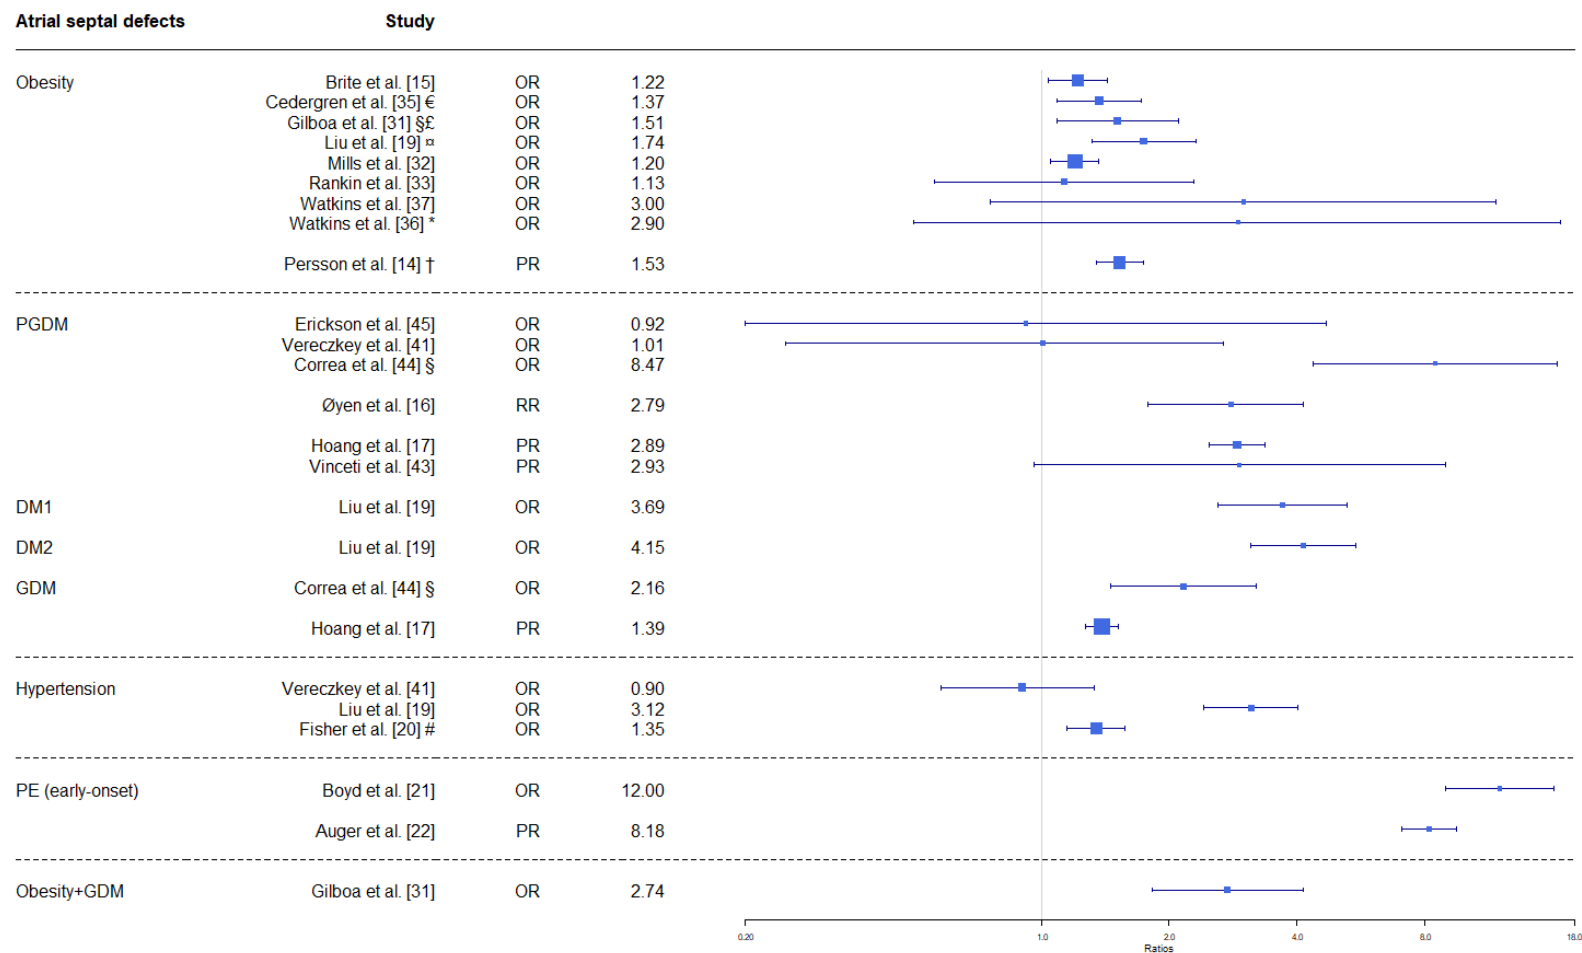

Note: obesity is defined as BMI  $\geq 30$  kg/m<sup>2</sup> unless other is stated; early-onset PE defined as debut before gestational week 34; PGDM are defined as DM1 or DM2; all risk estimates are adjusted unless other is stated; \*, not adjusted; §, isolated defects; ♂, obesity defined from ICD-10 codes; £, BMI  $\geq 35$  kg/m<sup>2</sup>; €, BMI  $> 29$  kg/m<sup>2</sup>; †, BMI 35- $<40$  kg/m<sup>2</sup>; #, untreated hypertension.

Abbreviations: BMI, body mass index; DM1, diabetes type 1; DM2, diabetes type 2; GDM, gestational diabetes; OR, odds ratio; PE, preeclampsia; PGDM, pregestational diabetes; PR, prevalence ratio; RR, risk ratio.
