# Supplementary material for: Maternal obesity and metabolic disorders associate with congenital heart defects in the offspring: a systematic review
Source: bioRxiv or medRxiv preprint supplement (doi:10.1101/2020.06.25.20140186), 2021-01-03
Supplement: Supplementary file [file media-2.pdf]

Table S1: Search protocol

PubMed and Embase: Publications between January 1, 1990 and October 6, 2019.

### Maternal overweight or obesity or metabolic syndrome and CHDs in offspring

#### PubMed Search Strategy

|                  | Aspect 1                                                                                                                                                                                                                                                                        | Aspect 2                                                                                        | Aspect 3                     |
|------------------|---------------------------------------------------------------------------------------------------------------------------------------------------------------------------------------------------------------------------------------------------------------------------------|-------------------------------------------------------------------------------------------------|------------------------------|
| MeSH             | Heart defects, congenital                                                                                                                                                                                                                                                       | Body Mass Index OR Overweight<br>OR Adiposity OR Thinness OR<br>Metabolic Syndrome              | Pregnancy OR Infant OR Fetus |
| Free text search | Congenital heart defect* OR<br>Congenital heart malformation*<br>OR CHD OR Congenital heart<br>disease* OR "Cardiac<br>abnormalities" OR "Cardiac<br>abnormality" OR Cardiac defect*<br>OR Fetal heart OR Fetal cardiac<br>defect* OR Foetal heart OR Foetal<br>cardiac defect* | BMI OR Maternal overweight OR<br>Maternal obesity OR Prepregnancy<br>BMI OR Prepregnancy weight | Offspring* OR Pregnancy      |

#### PubMed Search 2019-10-06

|     |                                                                                                                                                                                                                                                                                                                                                                                                                                                                                                                                                                                                                                                                                                                                                                                                                                                                        | No. of articles |
|-----|------------------------------------------------------------------------------------------------------------------------------------------------------------------------------------------------------------------------------------------------------------------------------------------------------------------------------------------------------------------------------------------------------------------------------------------------------------------------------------------------------------------------------------------------------------------------------------------------------------------------------------------------------------------------------------------------------------------------------------------------------------------------------------------------------------------------------------------------------------------------|-----------------|
| #1  | "Heart Defects, Congenital"[Majr]                                                                                                                                                                                                                                                                                                                                                                                                                                                                                                                                                                                                                                                                                                                                                                                                                                      | 121,469         |
| #2  | (((((Congenital heart defect*[Text Word]) OR Congenital heart malformation*[Text Word]) OR CHD[Text Word]) OR Congenital heart disease*[Text Word]) OR Cardiac abnormalities[Text Word]) OR Cardiac abnormality[Text Word]) OR Cardiac defect*[Text Word]) OR Fetal heart[Text Word]) OR Fetal cardiac defect*[Text Word]) OR Foetal heart[Text Word]) OR Foetal cardiac defect*[Text Word]                                                                                                                                                                                                                                                                                                                                                                                                                                                                            | 105,996         |
| #3  | #1 OR #2<br>("Heart Defects, Congenital"[Majr]) OR ((((((Congenital heart defect*[Text Word]) OR Congenital heart malformation*[Text Word]) OR CHD[Text Word]) OR Congenital heart disease*[Text Word]) OR Cardiac abnormalities[Text Word]) OR Cardiac abnormality[Text Word]) OR Cardiac defect*[Text Word]) OR Fetal heart[Text Word]) OR Fetal cardiac defect*[Text Word]) OR Foetal heart[Text Word]) OR Foetal cardiac defect*[Text Word]                                                                                                                                                                                                                                                                                                                                                                                                                        | 181,349         |
| #4  | ((("Body Mass Index"[Majr]) OR "Overweight"[Majr]) OR "Adiposity"[Majr]) OR "Thinness"[Majr]) OR "Metabolic Syndrome"[Majr]                                                                                                                                                                                                                                                                                                                                                                                                                                                                                                                                                                                                                                                                                                                                            | 185,465         |
| #5  | ((Maternal overweight[Text Word]) OR Maternal obesity[Text Word]) OR Prepregnancy BMI[Text Word]) OR Prepregnancy weight[Text Word]                                                                                                                                                                                                                                                                                                                                                                                                                                                                                                                                                                                                                                                                                                                                    | 3,677           |
| #6  | #4 OR #5<br>((((("Body Mass Index"[Majr]) OR "Overweight"[Majr]) OR "Adiposity"[Majr]) OR "Thinness"[Majr]) OR "Metabolic Syndrome"[Majr]) OR (((Maternal overweight[Text Word]) OR Maternal obesity[Text Word]) OR Prepregnancy BMI[Text Word]) OR Prepregnancy weight[Text Word])                                                                                                                                                                                                                                                                                                                                                                                                                                                                                                                                                                                    | 187,082         |
| #7  | ("Pregnancy"[Majr]) OR "Infant"[Majr]) OR "Fetus"[Majr]                                                                                                                                                                                                                                                                                                                                                                                                                                                                                                                                                                                                                                                                                                                                                                                                                | 273,767         |
| #8  | (Offspring*[Text Word]) OR Pregnancy[Text Word]                                                                                                                                                                                                                                                                                                                                                                                                                                                                                                                                                                                                                                                                                                                                                                                                                        | 975,184         |
| #9  | #7 OR #8<br>(((("Pregnancy"[Majr]) OR "Infant"[Majr]) OR "Fetus"[Majr])) OR ((Offspring*[Text Word]) OR Pregnancy[Text Word])                                                                                                                                                                                                                                                                                                                                                                                                                                                                                                                                                                                                                                                                                                                                          | 1,053,307       |
| #10 | #3 AND #6 AND #9<br>((((("Heart Defects, Congenital"[Majr]) OR ((((((Congenital heart defect*[Text Word]) OR Congenital heart malformation*[Text Word]) OR CHD[Text Word]) OR Congenital heart disease*[Text Word]) OR Cardiac abnormalities[Text Word]) OR Cardiac abnormality[Text Word]) OR Cardiac defect*[Text Word]) OR Fetal heart[Text Word]) OR Fetal cardiac defect*[Text Word]) OR Foetal heart[Text Word]) OR Foetal cardiac defect*[Text Word]))) AND ((((((("Body Mass Index"[Majr]) OR "Overweight"[Majr]) OR "Adiposity"[Majr]) OR "Thinness"[Majr]) OR "Metabolic Syndrome"[Majr])) OR (((Maternal overweight[Text Word]) OR Maternal obesity[Text Word]) OR Prepregnancy BMI[Text Word]) OR Prepregnancy weight[Text Word]))) AND (((("Pregnancy"[Majr]) OR "Infant"[Majr]) OR "Fetus"[Majr])) OR ((Offspring*[Text Word]) OR Pregnancy[Text Word])) | 114             |

#### Embase Search Strategy

|  | Aspect 1 | Aspect 2 | Aspect 3 |
|--|----------|----------|----------|
|--|----------|----------|----------|

Supporting information

|                                                                                                             |                                                                                                                                                                                                                                                     |                                                                                                                                                     |                                                                             |
|-------------------------------------------------------------------------------------------------------------|-----------------------------------------------------------------------------------------------------------------------------------------------------------------------------------------------------------------------------------------------------|-----------------------------------------------------------------------------------------------------------------------------------------------------|-----------------------------------------------------------------------------|
| "MeSH" / Subject Heading<br><br>(Keyword + Map Term to Subject Heading + Explode + Include All Subheadings) | congenital heart malformation                                                                                                                                                                                                                       | exp body mass/ or exp obesity/ or exp underweight/<br><br>("Obesity" broader term for "metabolic syndrome X", "maternal obesity", "morbid obesity") | exp high risk pregnancy/ or exp pregnancy/ or infant/ or newborn/ or fetus/ |
| Free text search<br><br>(Keyword)                                                                           | Congenital heart defect* OR Congenital heart malformation* OR CHD OR Congenital heart disease* OR Cardiac abnormalities OR Cardiac abnormality OR Cardiac defect* OR Fetal heart OR Fetal cardiac defect* OR Foetal heart OR Foetal cardiac defect* | Maternal overweight OR Maternal obesity OR Prepregnancy BMI OR Prepregnancy weight                                                                  | Offspring* OR Pregnancy                                                     |

*Embase Search 2019-10-06*

|        |                                                                                                                                                                                                                                                     | No. of articles |
|--------|-----------------------------------------------------------------------------------------------------------------------------------------------------------------------------------------------------------------------------------------------------|-----------------|
| #1     | exp congenital heart malformation/                                                                                                                                                                                                                  | 126,712         |
| #2     | Congenital heart defect* OR Congenital heart malformation* OR CHD OR Congenital heart disease* OR Cardiac abnormalities OR Cardiac abnormality OR Cardiac defect* OR Fetal heart OR Fetal cardiac defect* OR Foetal heart OR Foetal cardiac defect* | 128,917         |
| #3     | #1 OR #2                                                                                                                                                                                                                                            | 206,398         |
| #4     | exp high risk pregnancy/ or exp pregnancy/ or infant/ or newborn/ or fetus/                                                                                                                                                                         | 1,571,089       |
| #5     | Offspring* OR Pregnancy                                                                                                                                                                                                                             | 882,813         |
| #6     | #4 OR #5                                                                                                                                                                                                                                            | 1,768,205       |
| #7     | exp body mass/ or exp obesity/ or exp underweight/                                                                                                                                                                                                  | 761,522         |
| #8     | Maternal overweight OR Maternal obesity OR Prepregnancy BMI OR Prepregnancy weight                                                                                                                                                                  | 7,737           |
| #9     | #7 OR #8                                                                                                                                                                                                                                            | 762,132         |
| #10    | #3 AND #6 AND #9                                                                                                                                                                                                                                    | 1,046           |
| LIMITS | English Language + Exclude MEDLINE journals                                                                                                                                                                                                         | 91              |

**Maternal diabetes and CHDs in offspring**

## PubMed Search Strategy

|                  | Aspect 1                  | Aspect 2                                                                                                                      | Aspect 3                     |
|------------------|---------------------------|-------------------------------------------------------------------------------------------------------------------------------|------------------------------|
| MeSH             | Heart defects, congenital | Diabetes Mellitus OR Pregnancy in diabetics OR Hyperglycemia OR Insulin Resistance                                            | Pregnancy OR Infant OR Fetus |
| Free text search | (as above)                | Pregestational diabetes OR PGDM OR Maternal diabetes OR Gestational diabetes OR GDM OR Diabetic women OR Diabetic pregnancies | (as above)                   |

*PubMed Search 2019-10-06*

|    |                                                                                                                                                                                                                                    | No. of articles |
|----|------------------------------------------------------------------------------------------------------------------------------------------------------------------------------------------------------------------------------------|-----------------|
| #3 | #1 OR #2 (as above)                                                                                                                                                                                                                | 181,349         |
| #4 | ((("Diabetes Mellitus"[Majr]) OR "Pregnancy in Diabetics"[Mesh]) OR "Hyperglycemia"[Majr]) OR "Insulin Resistance"[Majr]                                                                                                           | 386,821         |
| #5 | (((((Pregestational diabetes[Text Word]) OR PGDM[Text Word]) OR Maternal diabetes[Text Word]) OR Gestational diabetes[Text Word]) OR GDM[Text Word]) OR Diabetic women[Text Word]) OR Diabetic pregnancies[Text Word]              | 20,405          |
| #6 | #4 OR #5<br>(((("Diabetes Mellitus"[Majr]) OR "Pregnancy in Diabetics"[Mesh]) OR "Hyperglycemia"[Majr]) OR "Insulin Resistance"[Majr])) OR ((((((Pregestational diabetes[Text Word]) OR PGDM[Text Word]) OR Maternal diabetes[Text | 393,455         |

|     |                                                                                                                                                                                                                                                                                                                                                                                                                                                                                                                                                                                                                                                                                                                                                                                                                                                                                                                                                |           |
|-----|------------------------------------------------------------------------------------------------------------------------------------------------------------------------------------------------------------------------------------------------------------------------------------------------------------------------------------------------------------------------------------------------------------------------------------------------------------------------------------------------------------------------------------------------------------------------------------------------------------------------------------------------------------------------------------------------------------------------------------------------------------------------------------------------------------------------------------------------------------------------------------------------------------------------------------------------|-----------|
|     | Word]) OR Gestational diabetes[Text Word]) OR GDM[Text Word]) OR Diabetic women[Text Word]) OR Diabetic pregnancies[Text Word])                                                                                                                                                                                                                                                                                                                                                                                                                                                                                                                                                                                                                                                                                                                                                                                                                |           |
| #9  | #7 OR #8 (as above)                                                                                                                                                                                                                                                                                                                                                                                                                                                                                                                                                                                                                                                                                                                                                                                                                                                                                                                            | 1,053,307 |
| #10 | #3 AND #6 AND #9<br>((((("Diabetes Mellitus"[Majr]) OR "Pregnancy in Diabetics"[Mesh]) OR "Hyperglycemia"[Majr]) OR "Insulin Resistance"[Majr])) OR ((((((Pregestational diabetes[Text Word]) OR PGDM[Text Word]) OR Maternal diabetes[Text Word]) OR Gestational diabetes[Text Word]) OR GDM[Text Word]) OR Diabetic women[Text Word]) OR Diabetic pregnancies[Text Word])) AND (((("Pregnancy"[Majr]) OR "Infant"[Majr]) OR "Fetus"[Majr]) OR ((Offspring*[Text Word]) OR Pregnancy[Text Word])) AND (("Heart Defects, Congenital"[Majr]) OR (((((((Congenital heart defect*[Text Word]) OR Congenital heart malformation*[Text Word]) OR CHD[Text Word]) OR Congenital heart disease*[Text Word]) OR Cardiac abnormalities[Text Word]) OR Cardiac abnormality[Text Word]) OR Cardiac defect*[Text Word]) OR Fetal heart[Text Word]) OR Fetal cardiac defect*[Text Word]) OR Foetal heart[Text Word]) OR Foetal cardiac defect*[Text Word])) | 632       |

## Embase Search Strategy

|                          | Aspect 1                      | Aspect 2                                                                                                                      | Aspect 3                                                                    |
|--------------------------|-------------------------------|-------------------------------------------------------------------------------------------------------------------------------|-----------------------------------------------------------------------------|
| "MeSH" / Subject Heading | congenital heart malformation | exp diabetes mellitus/ or exp hyperglycemia/ or exp insulin resistance/                                                       | exp high risk pregnancy/ or exp pregnancy/ or infant/ or newborn/ or fetus/ |
| Free text search         | (as above)                    | Pregestational diabetes OR PGDM OR Maternal diabetes OR Gestational diabetes OR GDM OR Diabetic women OR Diabetic pregnancies | (as above)                                                                  |

## Embase Search 2019-10-06

|        |                                                                                                                               | No. of articles |
|--------|-------------------------------------------------------------------------------------------------------------------------------|-----------------|
| #3     | #1 OR #2 (as above)                                                                                                           | 206,398         |
| #6     | #4 OR #5 (as above)                                                                                                           | 1,768,205       |
| #7     | exp diabetes mellitus/ or exp hyperglycemia/ or exp insulin resistance/                                                       | 1,005,513       |
| #8     | Pregestational diabetes OR PGDM OR Maternal diabetes OR Gestational diabetes OR GDM OR Diabetic women OR Diabetic pregnancies | 32,162          |
| #9     | #7 OR #8                                                                                                                      | 1,008,162       |
| #10    | #3 AND #6 AND #9                                                                                                              | 2,001           |
| LIMITS | English Language + Exclude MEDLINE journals                                                                                   | 182             |

## Maternal hypertension or preeclampsia and CHDs in offspring

## PubMed Search Strategy

|                  | Aspect 1                  | Aspect 2                                                                             | Aspect 3                     |
|------------------|---------------------------|--------------------------------------------------------------------------------------|------------------------------|
| MeSH             | Heart defects, congenital | Hypertension OR Hypertension, pregnancy-induced                                      | Pregnancy OR Infant OR Fetus |
| Free text search | (as above)                | Maternal hypertension OR Maternal hypertensive disorder* OR Gestational hypertension | (as above)                   |

## PubMed Search 2019-10-06

|    |                                                                                                                                                                                                                     | No. of articles |
|----|---------------------------------------------------------------------------------------------------------------------------------------------------------------------------------------------------------------------|-----------------|
| #3 | #1 OR #2 (as above)                                                                                                                                                                                                 | 181,349         |
| #4 | ("Hypertension"[Majr]) OR "Hypertension, Pregnancy-Induced"[Mesh]                                                                                                                                                   | 211,800         |
| #5 | ((Maternal hypertension[Text Word]) OR Maternal hypertensive disorder*[Text Word]) OR Gestational hypertension[Text Word]                                                                                           | 3,466           |
| #6 | #4 OR #5<br>((((("Hypertension"[Majr]) OR "Hypertension, Pregnancy-Induced"[Mesh])) OR (((Maternal hypertension[Text Word]) OR Maternal hypertensive disorder*[Text Word]) OR Gestational hypertension[Text Word])) | 213,166         |
| #9 | #7 OR #8 (as above)                                                                                                                                                                                                 | 1,053,307       |

|     |                                                                                                                                                                                                                                                                                                                                                                                                                                                                                                                                                                                                                                                                                                                                                                                                          |     |
|-----|----------------------------------------------------------------------------------------------------------------------------------------------------------------------------------------------------------------------------------------------------------------------------------------------------------------------------------------------------------------------------------------------------------------------------------------------------------------------------------------------------------------------------------------------------------------------------------------------------------------------------------------------------------------------------------------------------------------------------------------------------------------------------------------------------------|-----|
| #10 | #3 AND #6 AND #9<br>((((("Hypertension"[Majr] OR "Hypertension, Pregnancy-Induced"[Mesh])) OR (((Maternal hypertension[Text Word]) OR Maternal hypertensive disorder*[Text Word]) OR Gestational hypertension[Text Word]))) AND<br>((((("Pregnancy"[Majr] OR "Infant"[Majr] OR "Fetus"[Majr])) OR ((Offspring*[Text Word]) OR Pregnancy[Text Word]))) AND<br>AND ((("Heart Defects, Congenital"[Majr] OR (((((((Congenital heart defect*[Text Word]) OR Congenital heart malformation*[Text Word]) OR CHD[Text Word]) OR Congenital heart disease*[Text Word]) OR Cardiac abnormalities[Text Word]) OR Cardiac abnormality[Text Word]) OR Cardiac defect*[Text Word]) OR Fetal heart[Text Word]) OR Fetal cardiac defect*[Text Word]) OR Foetal heart[Text Word]) OR Foetal cardiac defect*[Text Word])) | 661 |
|-----|----------------------------------------------------------------------------------------------------------------------------------------------------------------------------------------------------------------------------------------------------------------------------------------------------------------------------------------------------------------------------------------------------------------------------------------------------------------------------------------------------------------------------------------------------------------------------------------------------------------------------------------------------------------------------------------------------------------------------------------------------------------------------------------------------------|-----|

*Embase Search Strategy*

|                          | Aspect 1                      | Aspect 2                                                                             | Aspect 3                                                                    |
|--------------------------|-------------------------------|--------------------------------------------------------------------------------------|-----------------------------------------------------------------------------|
| "MeSH" / Subject Heading | congenital heart malformation | exp hypertension/ or exp "eclampsia and preeclampsia"/                               | exp high risk pregnancy/ or exp pregnancy/ or infant/ or newborn/ or fetus/ |
| Free text search         | (as above)                    | Maternal hypertension OR Maternal hypertensive disorder* OR Gestational hypertension | (as above)                                                                  |

*Embase Search 2019-10-06*

|        |                                                                                      | No. of articles |
|--------|--------------------------------------------------------------------------------------|-----------------|
| #3     | #1 OR #2 (as above)                                                                  | 206,398         |
| #6     | #4 OR #5 (as above)                                                                  | 1,768,205       |
| #7     | exp hypertension/ or exp "eclampsia and preeclampsia"/                               | 735,885         |
| #8     | Maternal hypertension OR Maternal hypertensive disorder* OR Gestational hypertension | 18,442          |
| #9     | #7 OR #8                                                                             | 736,285         |
| #10    | #3 AND #6 AND #9                                                                     | 2,637           |
| LIMITS | English Language + Exclude MEDLINE journals                                          | 270             |

**Maternal dyslipidemia and CHDs in offspring***PubMed Search Strategy*

|                  | Aspect 1                  | Aspect 2                           | Aspect 3                     |
|------------------|---------------------------|------------------------------------|------------------------------|
| MeSH             | Heart defects, congenital | Dyslipidemias OR Lipoproteins, HDL | Pregnancy OR Infant OR Fetus |
| Free text search | (as above)                | HDL OR Dyslipidemia*               | (as above)                   |

*PubMed Search 2019-10-06*

|     |                                                                                                                                                                                                                                                                                                                                                                                                                                                                                                                                                                                                                                                                                                                                            | No. of articles |
|-----|--------------------------------------------------------------------------------------------------------------------------------------------------------------------------------------------------------------------------------------------------------------------------------------------------------------------------------------------------------------------------------------------------------------------------------------------------------------------------------------------------------------------------------------------------------------------------------------------------------------------------------------------------------------------------------------------------------------------------------------------|-----------------|
| #3  | #1 OR #2 (as above)                                                                                                                                                                                                                                                                                                                                                                                                                                                                                                                                                                                                                                                                                                                        | 181,349         |
| #4  | ("Dyslipidemias"[Majr] OR "Lipoproteins, HDL"[Majr])                                                                                                                                                                                                                                                                                                                                                                                                                                                                                                                                                                                                                                                                                       | 66,228          |
| #5  | (Dyslipidemia*[Text Word] OR HDL[Text Word])                                                                                                                                                                                                                                                                                                                                                                                                                                                                                                                                                                                                                                                                                               | 103,854         |
| #6  | #4 OR #5<br>(((("Dyslipidemias"[Majr] OR "Lipoproteins, HDL"[Majr])) OR ((Dyslipidemia*[Text Word]) OR HDL[Text Word]))                                                                                                                                                                                                                                                                                                                                                                                                                                                                                                                                                                                                                    | 138,647         |
| #9  | #7 OR #8 (as above)                                                                                                                                                                                                                                                                                                                                                                                                                                                                                                                                                                                                                                                                                                                        | 1,053,307       |
| #10 | #3 AND #6 AND #9<br>(#52 AND #96 AND #62)<br>((((("Dyslipidemias"[Majr] OR "Lipoproteins, HDL"[Majr])) OR ((Dyslipidemia*[Text Word]) OR HDL[Text Word]))) AND<br>AND (((("Pregnancy"[Majr] OR "Infant"[Majr] OR "Fetus"[Majr])) OR ((Offspring*[Text Word]) OR Pregnancy[Text Word]))) AND<br>AND ((("Heart Defects, Congenital"[Majr] OR (((((((Congenital heart defect*[Text Word]) OR Congenital heart malformation*[Text Word]) OR CHD[Text Word]) OR Congenital heart disease*[Text Word]) OR Cardiac abnormalities[Text Word]) OR Cardiac abnormality[Text Word]) OR Cardiac defect*[Text Word]) OR Fetal heart[Text Word]) OR Fetal cardiac defect*[Text Word]) OR Foetal heart[Text Word]) OR Foetal cardiac defect*[Text Word])) | 87              |

*Embase Search Strategy*

|  | Aspect 1 | Aspect 2 | Aspect 3 |
|--|----------|----------|----------|
|--|----------|----------|----------|

|                          |                               |                                                                                 |                                                                             |
|--------------------------|-------------------------------|---------------------------------------------------------------------------------|-----------------------------------------------------------------------------|
| "MeSH" / Subject Heading | congenital heart malformation | exp dyslipidemia/ or exp hypertriglyceridemia/ or exp high density lipoprotein/ | exp high risk pregnancy/ or exp pregnancy/ or infant/ or newborn/ or fetus/ |
| Free text search         | (as above)                    | HDL OR Dyslipidemia*                                                            | (as above)                                                                  |

*Embase Search 2019-10-06*

|        |                                                                                 | No. of articles |
|--------|---------------------------------------------------------------------------------|-----------------|
| #3     | #1 OR #2 (as above)                                                             | 206,398         |
| #6     | #4 OR #5 (as above)                                                             | 1,768,205       |
| #7     | exp dyslipidemia/ or exp hypertriglyceridemia/ or exp high density lipoprotein/ | 145,111         |
| #8     | HDL OR Dyslipidemia*                                                            | 166,506         |
| #9     | #7 OR #8                                                                        | 202,390         |
| #10    | #3 AND #6 AND #9                                                                | 187             |
| LIMITS | English Language + Exclude MEDLINE journals                                     | 17              |
