# Supplementary material for: Maternal obesity and metabolic disorders associate with congenital heart defects in the offspring: a systematic review
Source: bioRxiv or medRxiv preprint supplement (doi:10.1101/2020.06.25.20140186), 2021-01-03
Supplement: Supplementary file [file media-3.pdf]

Table S2: Newcastle-Ottawa Quality Assessment Scale – Case-control studies

| Selection                                                                     |                                                                                                                                              |   |
|-------------------------------------------------------------------------------|----------------------------------------------------------------------------------------------------------------------------------------------|---|
| 1. Is the case definition adequate?                                           | A. yes, with independent validation                                                                                                          | ☆ |
|                                                                               | B. yes, eg record linkage or based on self-reports                                                                                           |   |
|                                                                               | C. no description                                                                                                                            |   |
| 2. Representativeness of the cases                                            | A. consecutive or obviously representative series of cases                                                                                   | ☆ |
|                                                                               | B. potential for selection biases or not stated                                                                                              |   |
| 3. Selection of Controls                                                      | A. community controls                                                                                                                        | ☆ |
|                                                                               | B. hospital controls                                                                                                                         |   |
|                                                                               | C. no description                                                                                                                            |   |
| 4. Definition of Controls                                                     | A. no history of disease (endpoint)                                                                                                          | ☆ |
|                                                                               | B. no description of source                                                                                                                  |   |
| Comparability                                                                 |                                                                                                                                              |   |
| 1. Comparability of cases and controls on the basis of the design or analysis | A. study controls for _____<br>(Select the most important factor.)                                                                           | ☆ |
|                                                                               | B. study controls for any additional factor<br>(This criteria could be modified to indicate specific control for a second important factor.) | ☆ |
| Exposure                                                                      |                                                                                                                                              |   |
| 1. Ascertainment of exposure                                                  | A. secure record (eg surgical records)                                                                                                       | ☆ |
|                                                                               | B. structured interview where blind to case/control status                                                                                   | ☆ |
|                                                                               | C. interview not blinded to case/control status                                                                                              |   |
|                                                                               | D. written self-report or medical record only                                                                                                |   |
|                                                                               | E. no description                                                                                                                            |   |
| 2. Same method of ascertainment for cases and controls                        | A. yes                                                                                                                                       | ☆ |
|                                                                               | B. no                                                                                                                                        |   |
| 3. Non-Response rate                                                          | A. same rate for both groups                                                                                                                 | ☆ |
|                                                                               | B. non respondents described                                                                                                                 |   |
|                                                                               | C. rate different and no designation                                                                                                         |   |

Note: A study can be awarded a maximum of one star for each numbered item within the Selection and Exposure categories. A maximum of two stars can be given for Comparability.

Further explanations and manuals for the scale can be found at:

[http://www.ohri.ca/programs/clinical\\_epidemiology/oxford.asp](http://www.ohri.ca/programs/clinical_epidemiology/oxford.asp)

Table S2 (continued): Newcastle-Ottawa Quality Assessment Scale – Cohort studies

| Selection                                                                   |                                                                                                                                                                  |   |
|-----------------------------------------------------------------------------|------------------------------------------------------------------------------------------------------------------------------------------------------------------|---|
| 1. Representativeness of the exposed cohort                                 | A. truly representative of the average _____ (describe) in the community                                                                                         | ☆ |
|                                                                             | B. somewhat representative of the average _____ in the community                                                                                                 | ☆ |
|                                                                             | C. selected group of users eg nurses, volunteers                                                                                                                 |   |
|                                                                             | D. no description of the derivation of the cohort                                                                                                                |   |
| 2. Selection of the non-exposed cohort                                      | A. drawn from the same community as the exposed cohort                                                                                                           | ☆ |
|                                                                             | B. drawn from a different source                                                                                                                                 |   |
|                                                                             | C. no description of the derivation of the non-exposed cohort                                                                                                    |   |
| 3. Ascertainment of exposure                                                | A. secure record (eg surgical records)                                                                                                                           | ☆ |
|                                                                             | B. structured interview                                                                                                                                          | ☆ |
|                                                                             | C. written self-report                                                                                                                                           |   |
|                                                                             | D. no description                                                                                                                                                |   |
| 4. Demonstration that outcome of interest was not present at start of study | A. yes                                                                                                                                                           | ☆ |
|                                                                             | B. no                                                                                                                                                            |   |
| Comparability                                                               |                                                                                                                                                                  |   |
| 1. Comparability of cohorts on the basis of the design or analysis          | A. study controls for _____ (Select the most important factor.)                                                                                                  | ☆ |
|                                                                             | B. study controls for any additional factor (This criteria could be modified to indicate specific control for a second important factor.)                        | ☆ |
| Outcome                                                                     |                                                                                                                                                                  |   |
| 1. Assessment of outcome                                                    | A. independent blind assessment                                                                                                                                  | ☆ |
|                                                                             | B. record linkage                                                                                                                                                | ☆ |
|                                                                             | C. self-report                                                                                                                                                   |   |
|                                                                             | D. no description                                                                                                                                                |   |
| 2. Was follow-up long enough for outcomes to occur                          | A. yes (select an adequate follow up period for outcome of interest)                                                                                             | ☆ |
|                                                                             | B. no                                                                                                                                                            |   |
| 3. Adequacy of follow up of cohorts                                         | A. complete follow up - all subjects accounted for                                                                                                               | ☆ |
|                                                                             | B. subjects lost to follow up unlikely to introduce bias - small number lost - > ____ % (select an adequate %) follow up, or description provided of those lost) | ☆ |
|                                                                             | C. follow up rate < ____% (select an adequate %) and no description of those lost                                                                                |   |
|                                                                             | D. no statement                                                                                                                                                  |   |

Note: A study can be awarded a maximum of one star for each numbered item within the Selection and Outcome categories. A maximum of two stars can be given for Comparability.

Further explanations and manuals for the scale can be found at:

[http://www.ohri.ca/programs/clinical\\_epidemiology/oxford.asp](http://www.ohri.ca/programs/clinical_epidemiology/oxford.asp)
