# Supplementary material for: Maternal obesity and metabolic disorders associate with congenital heart defects in the offspring: a systematic review
Source: bioRxiv or medRxiv preprint supplement (doi:10.1101/2020.06.25.20140186), 2021-01-03
Supplement: Supplementary file [file media-4.pdf]

Table S3: Characteristics of included studies

| Author/publication year | Country of study population | Study design          | Population size | Cases with CHDs | Included study population            | Plurality  | Maternal exposure                      | Sources of maternal exposure | NOS score |
|-------------------------|-----------------------------|-----------------------|-----------------|-----------------|--------------------------------------|------------|----------------------------------------|------------------------------|-----------|
| Hoang 2016 [17]         | USA (Texas)                 | Cohort                | 4 207 898       | 48 249          | Live births                          | All        | PGDM (not specified), GDM              | Registers                    | 8         |
| Persson 2019 [14]       | Sweden                      | Cohort                | 2 050 491       | 28 628          | Live births                          | Singletons | Obesity                                | Registers                    | 8         |
| Liu 2013 [19]           | Canada (excl. Quebec)       | Cohort                | 2 278 838       | 26 488          | Live births                          | All        | Obesity, DM1, DM2, hypertension        | Registers                    | 8         |
| Chou 2016 [46]          | Taiwan                      | Cohort                | 1 387 650       | 23 483          | Live births                          | All        | DM1, DM2, hypertension                 | Registers                    | 8         |
| Boyd 2017 [21]          | Denmark                     | Cohort                | 1 972 857       | 18 038          | Live births                          | Singletons | PE                                     | Registers                    | 8         |
| Auger 2015 [22]         | Canada (Quebec)             | Cohort                | 1 942 072       | 17 296          | Live births                          | All        | PE                                     | Registers                    | 8         |
| Ludvigsson 2018 [13]    | Sweden                      | Cohort                | 1 162 323       | 17 242          | Live births                          | Singletons | DM1                                    | Registers                    | 8         |
| Øyen 2016 [16]          | Denmark                     | Cohort                | 2 025 727       | 16 325          | Live births                          | Singletons | PGDM (DM1 or DM2), GDM                 | Registers                    | 8         |
| Blomberg 2010 [30]      | Sweden                      | Cohort                | 1 049 582       | 11 163          | Live births, stillbirths             | Not stated | Obesity                                | Registers                    | 8         |
| Fisher 2017 [20]        | USA                         | Case-control (NBDPS)  | 21 762          | 10 625          | Live births, stillbirths, terminated | Singletons | Untreated hypertension                 | Interviews                   | 8         |
| Leirgul 2016 [18]       | Norway                      | Cohort                | 914 427         | 10 575          | Live births, stillbirths, terminated | Singletons | PGDM (DM1, DM2 or unspecified DM), GDM | Registers                    | 8         |
| Block 2013 [29]         | USA (Florida)               | Case-control          | 1 124 370       | 9 314           | Live births                          | Singletons | Obesity                                | Registers                    | 7         |
| Mills 2010 [32]         | USA (New York State)        | Case-control (nested) | 63 696          | 7 392           | Live births                          | Singletons | Obesity                                | Medical records              | 7         |
| Cedergren 2003 [35]     | Sweden                      | Case-control          | 812 457         | 6 801           | Live births, stillbirths             | Not stated | Obesity                                | Registers                    | 7         |
| Gilboa 2010 [31]        | USA                         | Case-control (NBDPS)  | 12 113          | 6 440           | Live births, stillbirths             | Not stated | Obesity, obesity+GDM                   | Interviews                   | 8         |
| Correa 2008 [44]        | USA                         | Case-control (NBDPS)  | 17 925          | 4 621           | Live births                          | Not stated | PGDM (DM1 or DM2), GDM                 | Interviews                   | 8         |
| Vereczkey 2014 [41]     | Hungary                     | Case-control          | 41 713          | 3 562           | Live births                          | All        | PGDM (DM1 or DM2), hypertension        | Registers                    | 8         |
| Brodwall 2016 [48]      | Norway                      | Cohort                | 914 703         | 2 473           | Live births, stillbirths, terminated | Singletons | PE                                     | Registers                    | 8         |

|                     |                             |                               |           |       |                                      |            |                                              |                                 |   |
|---------------------|-----------------------------|-------------------------------|-----------|-------|--------------------------------------|------------|----------------------------------------------|---------------------------------|---|
| Sharpe 2005 [47]    | Australia (South Australia) | Cohort                        | 282 260   | 2 418 | Live births, stillbirths             | Singletons | DM1, GDM (GDM or impaired glucose tolerance) | Interviews                      | 8 |
| Liu 2015 [39]       | China (Tianjin)             | Cohort                        | 90 796    | 1 817 | Live births                          | All        | Obesity, GDM                                 | Questionnaire / medical records | 8 |
| Brite 2014 [15]     | USA                         | Cohort (CSL)                  | 121 815   | 1 388 | Live births                          | Singletons | Obesity                                      | Medical records                 | 8 |
| Watkins 2001 [37]   | USA                         | Case-control (ABDCCS)         | 4 078     | 1 049 | Live births, stillbirths             | Not stated | Obesity                                      | Interviews                      | 7 |
| Agopian 2012 [40]   | USA (Texas)                 | Cohort                        | 3 806 299 | 563   | Live births, stillbirths, terminated | All        | Obesity, PGDM (not specified), GDM           | Registers                       | 8 |
| Rankin 2010 [33]    | England                     | Cohort                        | 41 013    | 341   | Live births, stillbirths, terminated | Singletons | Obesity                                      | Registers                       | 8 |
| Shaw 2008 [34]      | USA (California)            | Case-control                  | 1 359     | 323   | Live births, stillbirths, terminated | Not stated | Obesity                                      | Interviews                      | 8 |
| Kovalenko 2018 [42] | Russia (Murmansk)           | Cohort                        | 52 253    | 233   | Live births                          | Singletons | PGDM (DM1 or DM2)                            | Registers                       | 8 |
| Shaw 2000 [38]      | USA (California)            | Case-control                  | 2 033     | 202   | Live births, stillbirths             | Not stated | Obesity                                      | Interviews                      | 7 |
| Watkins 2003 [36]   | USA                         | Case-control (Atlanta BDRFSS) | 525       | 195   | Live births, stillbirths, terminated | Not stated | Obesity                                      | Interviews                      | 7 |
| Vinceti 2014 [43]   | Italy                       | Case-control (nested)         | 479 720   | 68    | Live births, stillbirths             | All        | PGDM (DM1 or DM2)                            | Registers                       | 8 |
| Erickson 1991 [45]  | USA                         | Case-control (ABDCCS)         | 7 900     | 35    | Live births, stillbirths             | Not stated | PGDM (not specified)                         | Interviews                      | 7 |

Note: Studies listed after number of CHD cases: studies with most cases first etc.

Abbreviations: ABDCCS, Atlanta Birth Defect Case-Control Study; BDRFSS, Birth Defects Risk Factor Surveillance Study; CHDs, congenital heart defects; CM, congenital malformations; CSL, The Consortium of Safe Labor; DM1, diabetes mellitus type 1; DM2, diabetes mellitus type 2; GDM, gestational diabetes mellitus; NBDPS, National Birth Defects Prevention Study; NOS, Newcastle Ottawa Scale; PE, preeclampsia; PGDM, pregestational diabetes.
